1 **Getting close to nature – *Plasmodium knowlesi* reference genome sequences from contemporary**  
2 **clinical isolates.**

3 Authors: Damilola R. Oresgun<sup>1¶</sup>, Peter Thorpe<sup>1¶</sup>, Ernest Diez Benavente <sup>1</sup>, Susana Campino <sup>2</sup>, Fauzi  
4 Muh<sup>1</sup>, Robert Moon <sup>2</sup>, Taane G. Clark <sup>2,3</sup>, Janet Cox-Singh<sup>1\*</sup>

5

6 <sup>1</sup> Division of Infection and Global Health, School of Medicine, University of St Andrews, KY16 9TF, St  
7 Andrews, Scotland, UK;

8 <sup>2</sup> Faculty of Infectious and Tropical Diseases, London School of Hygiene & Tropical Medicine, WC1E  
9 7HT London, UK;

10 <sup>3</sup> Faculty of Epidemiology and Population Health, London School of Hygiene & Tropical Medicine,  
11 WC1E 7HT London, UK

12

13 \*Corresponding author

14 E-mail: [jcs26@st-andrews.ac.uk](mailto:jcs26@st-andrews.ac.uk)

15

16 ¶ These authors contributed equally to this work.

17

18 **Abstract**

19 *Plasmodium knowlesi*, a malaria parasite of old-world macaque monkeys, is used extensively to  
20 model *Plasmodium* biology. Recently *P. knowlesi* was found in the human population of Southeast  
21 Asia, particularly Malaysia. *P. knowlesi* causes un-complicated to severe and fatal malaria in the  
22 human host with features in common with the more prevalent and virulent malaria caused by  
23 *Plasmodium falciparum*.

24 As such *P. knowlesi* presents a unique opportunity to inform an experimental model for malaria with  
25 clinical data from same-species human infections.

26 Experimental lines of *P. knowlesi* represent well characterised genetically static parasites and to  
27 maximise their utility as a backdrop for understanding malaria pathophysiology, genetically diverse  
28 contemporary clinical isolates, essentially wild-type, require comparable characterization.

29

30 The Oxford Nanopore PCR-free long-read sequencing platform was used to sequence *P. knowlesi*  
31 parasites from archived clinical samples. The sequencing platform and assembly pipeline was  
32 designed to facilitate capturing data on important multiple gene families, including the *P. knowlesi*  
33 *schizont-infected cell agglutination (SICA) var* genes and the *Knowlesi-Interspersed Repeats (KIR)*  
34 genes.

35 The *SICAvar* and *KIR* gene families code for antigenically variant proteins that have been difficult to  
36 resolve and characterise. Analyses presented here suggest that the family members have arisen  
37 through a process of gene duplication, selection pressure and variation. Highly evolving genes tend  
38 to be located proximal to genetic elements that drive change rather than regions that support core  
39 gene conservation. For example, the virulence-associated *P. falciparum* erythrocyte membrane  
40 protein (*PfEMP1*) gene family members are restricted to relatively unstable sub-telomeric regions.  
41 In contrast the *SICAvar* and *KIR* genes are located throughout the genome but as the study  
42 presented here shows, they occupy otherwise gene-sparse chromosomal locations.  
43 The novel methods presented here offer the malaria research community new tools to generate  
44 comprehensive genome sequence data from small clinical samples and renewed insight into these  
45 complex real-world parasites.

46

#### 47 **Author summary**

48 Malaria is a potentially severe disease caused by parasite species within genus *Plasmodium*.  
49 Even though the number of cases is in decline there were over 200 million reported cases of  
50 malaria in 2019 that resulted in >400,000 deaths. Despite huge research efforts we still do  
51 not understand precisely how malaria makes some individuals very ill and by extension how  
52 to successfully augment and manage severe disease.

53 Here we developed a novel method to generate comprehensive robust genome sequences  
54 from the malaria parasite *Plasmodium knowlesi* collected from clinical samples.

55 We propose to use the method and initial data generated here to begin to build a resource  
56 to identify disease associated genetic traits of *P. knowlesi* taken from patient's samples. In  
57 addition to the methodology, what further sets this work apart is the unique opportunity to  
58 utilize same-species experimental *P. knowlesi* parasites to discover a potential role for  
59 particular parasite traits in the differential disease progression we observe in patients with  
60 *P. knowlesi* malaria.

61 While we developed the methods to study severe malaria, they are affordable and  
62 accessible, and offer the wider malaria research community the means to add context and  
63 insight into real-world malaria parasites.

64

#### 65 **Introduction**

66 *Plasmodium knowlesi* is a malaria parasite first described in a natural host, the long-tailed macaque  
67 monkey (*Macaca fascicularis*), in the early part of the 20<sup>th</sup> Century [1]. Although an incidental find, *P.*

68 *knowlesi* was soon exploited as a model parasite for malaria research [2-4]. Experimental *P. knowlesi*  
69 was well-characterised over time with several additional lines adapted from natural hosts in  
70 geographically distinct regions, including a human infection [2-6]. Taken together, experimental lines  
71 of *P. knowlesi* are important members of the malaria research arsenal.

72 What sets *P. knowlesi* apart is that it occupies several important niche areas - as an experimental  
73 model, a natural parasite of Southeast Asian macaque monkeys and the causative agent of zoonotic  
74 malaria in the human host [7]. In nature, transmission is established in the jungles of Southeast Asia,  
75 areas that support the sylvan mosquito vectors, the parasite and the natural macaque hosts. People  
76 who enter transmission sites are susceptible to infected mosquito bites and infection. *P. knowlesi*  
77 has effectively crossed the vertebrate host species divide and is responsible for malaria in  
78 contemporary human hosts [8].

79 Zoonotic malaria caused by *P. knowlesi* is currently the most common type of malaria in Malaysia,  
80 with most of the cases reported in Malaysian Borneo [9]. Indeed, naturally acquired *P. knowlesi*  
81 malaria causes a spectrum of disease from uncomplicated to severe and fatal infections with  
82 tantalizing similarity to severe adult malaria caused by *P. falciparum* [10-13]

83 The clinical similarities observed in patients with severe *P. knowlesi* and *P. falciparum* infections  
84 suggest that *P. knowlesi* has the potential to serve as both a human pathogen and animal model for  
85 severe malaria pathophysiology that has hitherto eluded medical science [11, 14, 15].

86 To take this idea forward, it seemed prudent to compare genome sequences derived from  
87 contemporary clinical isolates of *P. knowlesi* with the reference *P. knowlesi* genome generated from  
88 a genetically static and laboratory passaged experimental line [16].

89 We developed methods to produce high-quality Illumina short-read *P. knowlesi* genome sequence  
90 data from frozen clinical blood samples [17]. The outputs of this work identified genome-wide  
91 diversity, including genomic dimorphism in *P. knowlesi* isolates from patients. Comparisons also  
92 highlighted that reference *P. knowlesi* genome sequence data, generated from experimental lines  
93 established mid-twentieth century, may not properly reflect and capture important loci for research  
94 on malaria pathophysiology, particularly multiple gene families.

95 *Plasmodium* species have a number of multiple gene families encoding infected red blood cell  
96 surface proteins that are antigenic and highly variable to avoid host immune recognition and  
97 parasite destruction [18, 19]. Of these are the *P. falciparum* erythrocyte membrane protein  
98 (*PfEMP1*) gene family members with an estimated 67 copies in the *P. falciparum* 3D7 reference  
99 genome and variable copy numbers in clinical isolates (n = 47 – 90) [20] [21]. While other multiple  
100 gene families are described in all *Plasmodium* species studied to date, *PfEMP1* gene-like families are  
101 rare, and among the parasites that cause human infection, are found only in *P. falciparum* and *P.*

102 *knowlesi* [16, 20]. *PfEMP1* genes are expressed in a mutually exclusive manner with only one  
103 predominantly expressed at any one time [22-24]. Importantly *PfEMP1* gene expression is  
104 implicated in *P. falciparum* virulence and progression to severe disease [19, 22, 25-29]. The  
105 comparable *P. knowlesi schizont-infected cell agglutination (SICA) var* gene family has been reported  
106 in detail in various experimental lines [3, 16, 30, 31]. Corredor *et al*, (2004) described conserved yet  
107 polymorphic repeat patterns in a 3' untranslated region (*SICAv* 3' UTR sequences) of a particular  
108 SICA gene from the experimental clone *P. knowlesi* Pk1B<sup>+</sup>. They suggest the *SICAv* 3' UTR may be a  
109 site for extensive recombination and have implication in post-transcriptional *SICAv* gene  
110 expression regulation [30-32]. To our knowledge, the *P. knowlesi* *SICAv* gene family and 3' UTR's  
111 have not yet been described in-depth, in wild-type isolates, including *P. knowlesi* isolated from  
112 clinical infections. Given the *PfEMP1* gene association with severe disease in *P. falciparum*, we are  
113 particularly interested in characterising variation and disease association between the *P. knowlesi*  
114 *SICAv* gene family members in clinical isolates.

115 Genome sequence data for multiple gene families in general and *Plasmodium* spp. in particular are  
116 difficult to resolve using Illumina short-read sequencing platforms. This is due to sequence similarity  
117 between the family members and long stretches of regions of low complexity [17] [33]. In addition,  
118 most *Plasmodium* reference genome sequences are derived from experimental lines that may  
119 incompletely represent multiple gene families. Recently, the PacBio long-read sequencing platform  
120 was used to describe, for the first time, the core *P. falciparum* genome in clinical isolates and demark  
121 sub-telomeric regions to compare genome organisation and diversity between clinical isolates from  
122 different geographical regions and the commonly used *P. falciparum* clone 3D7 [21].

123 Keeping in mind comparative biology, pathobiology and genomics, we propose to describe multiple  
124 gene family organisation, location and copy number in *P. knowlesi* clinical isolates using long read  
125 amplification-free sequencing. The PacBio platform is outside of our reach because we have small  
126 volume frozen whole blood samples that yield parasite DNA well below the quantity required for  
127 amplification-free PacBio sequencing [21, 30, 34]. Here we use the accessible, portable and  
128 affordable Oxford Nanopore Technologies MinION long-read sequencing platform to *de novo*  
129 assemble two new *P. knowlesi* reference genome sequences representing each of genetically  
130 dimorphic forms of *P. knowlesi* found in our patient cohort [17] [35].

131 The new reference genomes will, for the first time, provide insight into clinically relevant  
132 contemporary *P. knowlesi* parasites. These diverse parasites are essentially wild-type and the product  
133 of ongoing mosquito transmission and recombination in nature [17, 36-39]. The genomes will offer a  
134 valuable resource not only for our studies on members of the *SICAv* gene family and virulence but

135 also to the wider zoonotic malaria research community working on comparative biology of malaria  
136 parasites, drug discovery and vaccine development.

137

## 138 **Results**

### 139 *Evaluating draft de novo genomes*

140 The genome pipeline, beginning with Oxford Nanopore Technologies (ONT) MinION sequencing  
141 through to *de novo* assembly and genome annotation with downstream analyses, is shown (Fig 1).

142 The pipeline was used to produce draft *P. knowlesi de novo* genomes using DNA extracted from two  
143 clinical isolates sks047 and sks048 and for comparison the well characterised cultured line, *P.*

144 *knowlesi* A1-H.1. For purpose of clarity, the *P. knowlesi* A1-H.1 *de novo* draft genome assembled  
145 here is referred to as StAPkA1H1 (please see methods section). Read coverage of 225x, 71x and 65x  
146 was obtained for StAPkA1H1, sks047 and sks048 respectively (**Error! Reference source not found.**).

147 The draft assemblies resolved into 100 or fewer contigs before further reduction to <72 contigs after  
148 scaffolding (Table 1). The quality of the draft assemblies was improved with Medaka's polishing

149 resulting in Benchmarking Universal Single-Copy Orthologues (BUSCO) scores that increased from  
150 68.6 to 89.7 (a 30.8% increase), 67.2 to 85.5 (a 27.2% increase) and 68.8 to 85.9 (a 24.8% increase)

151 for StAPkA1H1, sks047 and sks048 respectively with BUSCO completeness scores for the clinical  
152 isolates reaching 95%. (Table 1). The observed increase in the number of contigs from 23.57 to

153 23.63Mb (0.22% increase) for sks047 and 24.49 to 24.56Mb (0.32% increase) for sks048 was likely  
154 due to the addition of relatively shorter reads (Table 1).

155

156 **Fig 1.** *Plasmodium knowlesi de novo* genome pipeline. The pipeline represents major forms of  
157 manipulation taken and tools utilised to generate, annotate and analyse the two reference genomes  
158 derived from clinical isolates.

159

160 The combination of previously sequenced Illumina reads data with 34x and 166x short read coverage  
161 for sks047 and sks048 respectively offered the opportunity for Pilon polishing the newly generated

162 ONT sequence data for clinical isolates sks047 and sks048. Pilon polishing resulted in improved  
163 BUSCO scores with sks047 seeing an 11.9% improvement (85.5 to 95.7) and sks048 showing an

164 11.4% improvement (85.9 to 95.7) (Table 1). Although Pilon did not change the number of contigs  
165 both sks047 and sks048 saw a total length increase of 0.05% and BUSCO score increases. Additional

166 Illumina sequencing was not available for StAPkA1H1 and Pilon polishing was not possible.

167 Scaffolding, chromosome structuring and subsequent annotation initially proved difficult due to

168 large sections of chromosomes 2 and 3 consistently being incorrectly placed in chromosomes 14 and

**Table 1 Overview of assembly and quality metrics of the de novo assembled draft assemblies.**

| <i>Isolate</i>     | <i>Coverage</i> | <i>de novo assembly length (Mb)</i> |               |              |               |                 | <i>Contigs/Scaffolds/Chromosomes</i> |               |              |               |                 | <i>BUSCO Completeness Score (%)</i> |               |              |               |                 |
|--------------------|-----------------|-------------------------------------|---------------|--------------|---------------|-----------------|--------------------------------------|---------------|--------------|---------------|-----------------|-------------------------------------|---------------|--------------|---------------|-----------------|
|                    |                 | <i>Raw</i>                          | <i>Medaka</i> | <i>Pilon</i> | <i>RagTag</i> | <i>Complete</i> | <i>Raw</i>                           | <i>Medaka</i> | <i>Pilon</i> | <i>RagTag</i> | <i>Complete</i> | <i>Raw</i>                          | <i>Medaka</i> | <i>Pilon</i> | <i>RagTag</i> | <i>Complete</i> |
| <i>PKNH [16]</i>   | -               | -                                   | -             | -            | -             | 24.36           | -                                    | -             | -            | -             | 15              | -                                   | -             | -            | -             | 97.6            |
| <i>PKA1H1 [40]</i> | -               | -                                   | -             | -            | -             | 24.27           | -                                    | -             | -            | -             | 14              | -                                   | -             | -            | -             | 94.4            |
| <i>StAPkA1H1</i>   | 225X            | 24.15                               | 24.14         | N/A          | 24.39         | 24.39           | 73                                   | 111           | N/A          | 71            | 15              | 68.6                                | 89.7          | -            | 89.7          | 89.5            |
| <i>sks047</i>      | 71X             | 23.57                               | 23.63         | 23.64        | 24.17         | 24.17           | 100                                  | 116           | 116          | 69            | 15              | 67.2                                | 85.5          | 95.7         | 95.9          | 95.9            |
| <i>sks048</i>      | 65X             | 24.49                               | 24.56         | 24.57        | 24.81         | 24.81           | 74                                   | 94            | 94           | 50            | 15              | 68.8                                | 85.9          | 95.7         | 95.7          | 95.6            |

Legend to Table 1: Quality improvements in the three *de novo* draft assemblies StPka1H1, sks047 and sks048 were achieved by polishing with Medaka (Oxford Nanopore Technologies, 2019) and Pilon [41], checks for chimeric contig and scaffolding with RagTag [42] and annotation of the draft assemblies with Companion [43]. The published *P. knowlesi* PKNH and PkA1H1 reference genomes generated from experimental lines were available in their complete forms. Information on raw reads and assembly was not available for comparison here.

169 13, respectively. These large-scale inconsistencies were the result of contig chimers and were  
170 minimised or entirely corrected by de-chimerisation using RagTag. Chromosomes corrected by  
171 RagTag retained regions of variability for the nuclear genome assemblies (apicomplast (API) and  
172 mitochondria (MIT)-free) although RagTag did not provide a complete solution in resolving all  
173 variable sequences (SI Fig 1; SI Fig 2). In addition, it is possible that RagTag did not entirely retain  
174 highly variable regions such as telomeric regions that may have resulted in loss of coverage of genes  
175 positioned at extreme chromosomal boundaries (SI Fig 1).

176

### 177 *Genome Annotation and gene content*

178 Companion software resolved all three nuclear genomes StAPkA1H1, sks047 and sks048 into 15  
179 chromosomes – 14 Pk chromosomes and 1 ‘bin’ ‘00’ chromosome holding sequence fragments  
180 which could not be confidently placed by the Companion pipeline (Table 2). Each draft genome was  
181 assigned a similar or greater number of coding genes than the PKNH reference genome (5327 genes)  
182 when full protein-coding genes and pseudogenes annotated with predicted function (implying  
183 missing ‘start’ and/or ‘stop’ codons) were combined. The StAPkA1H1 draft assembly was found to  
184 have 5358 genes (4385 coding + 973 pseudogenes), while the patient isolate draft genomes - sks047  
185 and sks048 had 5327 genes (4886 coding + 441 pseudogenes) and 5398 genes (4904 coding + 494  
186 pseudogenes) respectively (**Error! Reference source not found.**). Non-coding genes were also found  
187 in all three draft genomes, including multiple small nuclear RNA (snRNA) (Supplementary File 1).

188 *Schizont-infected cell agglutination (SICAvar)* and the *Knowlesi-Interspersed Repeats (KIR)* multiple  
189 gene families were annotated in each draft genome (Table 2). There were consistently fewer *KIR*  
190 gene family members in the draft genomes derived from clinical isolates; sks047, *KIR* n = 22 and  
191 sks048 *KIR* n = 25 compared with the experimental lines StAPkA1H1 *KIR* n = 51, and the published  
192 PKNH reference genome *KIR* n = 61 (**Error! Reference source not found.**). It is unlikely that this is a  
193 result of assembly error given that StAPkA1H1 and the clinical isolates sks047 and sks048 were  
194 sequenced and *de novo* assembled in parallel using the same methodologies with the exception of  
195 Pilon polishing for StAPkA1H1. Indeed, the dN/dS ratio (see below) supports divergence of the *KIR*  
196 gene family.

197 All three draft genomes had more *SICAvar* Type 1 genes annotated (StAPkA1H1, *SICAvar* type 1 n =  
198 191; sks047 *SICAvar* type 1, n = 115 and sks048 *SICAvar* type 1 n = 153 compared with the reference  
199 genome PKNH *SICAvar* type 1 n = 89 (Table 2). *SICAvar* gene fragments in each of the clinical isolate  
200 draft genomes, sks047 and sks048, outnumbered annotated Type 1 genes (Table 2). Conversely the  
201 StAPkA1H1 draft genome had approximately half the number of *SICAvar* gene fragments compared  
202 with the clinical isolates and compared with StAPkA1H1 Type 1 genes (Table 2). The complement of

**Table 2 Summary of the complete de novo draft genomes compared to the published *P. knowlesi* PKNH and PkA1H1 reference genomes.**

| <i>Isolate</i>    | <i>Complete assembly length (Mb)*</i> | <i>Contigs</i> | <i>Chromosomes</i> | <i>N50 (Mb)</i> | <i>N count</i> | <i>Gaps</i> | <i>Genes**</i> | <i>Total pseudo-genes</i> | <i>Shared Orthologous clusters w. reference</i> | <i>Unique orthologous clusters</i> | <i>Singleton clusters</i> | <i>KIRs</i> | <i>SICAvars***</i> |    |       |
|-------------------|---------------------------------------|----------------|--------------------|-----------------|----------------|-------------|----------------|---------------------------|-------------------------------------------------|------------------------------------|---------------------------|-------------|--------------------|----|-------|
|                   |                                       |                |                    |                 |                |             |                |                           |                                                 |                                    |                           |             | T1                 | T2 | SDM's |
| <i>PKNH [16]</i>  | 24.36                                 | -              | 15                 | 2.16            | 11381          | 98          | 5327           | 12                        | -                                               | -                                  | -                         | 61          | 89                 | 20 | 127   |
| <i>PKA1H1[40]</i> | 24.27                                 | 156            | 14                 | 2.19            | 148255         | 142         | -              | -                         | -                                               | -                                  | -                         | -           | -                  | -  | -     |
| <i>StAPkA1H1</i>  | 24.39                                 | 71             | 15                 | 2.13            | 288598         | 127         | 5358           | 973                       | 4172                                            | 3                                  | 62                        | 51          | 191                | 15 | 88    |
| <i>sks047</i>     | 24.17                                 | 69             | 15                 | 2.09            | 544896         | 109         | 5327           | 441                       | 4666                                            | 9                                  | 82                        | 22          | 115                | 9  | 181   |
| <i>sks048</i>     | 24.81                                 | 50             | 15                 | 2.21            | 283076         | 84          | 5398           | 494                       | 4664                                            | 11                                 | 100                       | 25          | 153                | 7  | 196   |

Legend to Table 2: *SICAv* domain fragments are found annotated across the genomes; combinations of these fragments can form complete *SICAv* proteins, indicating the possibility of a larger number of *SICAv* proteins present in native genomes. Gene data for reference PkA1H1 was unavailable.

\* total genome length excluding the mitochondrial and apicoplast genome sequences

\*\* total number of coding genes and pseudogenes identified with a function

\*\*\* *SICAv* Type 1 (T1); *SICAv* Type 2 (T2); *SICAv* single domain fragments (SDM's). Single domain fragments code for *SICAv* protein fragments.



203 *SICAv* genes and gene fragments in the draft genomes presented here were resolved to the best  
204 current sequencing technology. The differences observed between *SICAv* gene copy numbers and  
205 fragment copy numbers in clinical isolates compared with those in experimental lines deserves  
206 further investigation.

207

208 In regions of the draft genomes where gaps could not be resolved contigs which had evidence that  
209 they belong together either by long reads spanning them, or similarity to the reference, were  
210 scaffolded with N bases, proportional to the gap size (Table 2). Higher N counts are observed in the  
211 three AM-F draft genomes generated here compared with the published reference genome (PKNH).  
212 Sequences placed in the draft genome ‘bin’ chr 00 may reflect the higher N counts in chromosomes  
213 1 – 14. The ‘bin’ chr 00 of StAPkA1H1 clustered with the PKNH reference ‘bin’ chr 00 (SI Fig 2A)  
214 suggesting the StAPkA1H1 draft genome had a similar structure to the PKNH reference genome,  
215 including ‘unplaced’ genes. In contrast, sks047 and sks048 ‘00’ chromosome sequences are  
216 distributed across the reference genomes, suggesting no single chromosome was more challenging  
217 to scaffold after de-chimerisation (SI Fig 2ii, iii). The number of gaps in the three draft AM-F draft  
218 genomes was variable but within the range of the PKNH reference genome (Table 2).

219 Orthologous genes were determined using a similarity approach by OrthoMCL in Companion show  
220 all three AM-F draft genomes share >4000 orthologs with the PKNH reference genome (Table 2).  
221 These orthologous genes can be considered as the core *P. knowlesi* gene set and are indicative of  
222 reliable and accurate assemblies (Table 2). In particular, the contemporary patient isolates – sks047  
223 and sks048 – show >4600 shared orthologues with the PKNH reference genome (Table 2).

224

#### 225 *Apicoplast and Mitochondrial circularisation*

226 The apicoplast genome (API) could not be assembled for sks047, and while API contigs were  
227 successfully assembled for StAPkA1H1 and sks048 (SI Table 1). API resolved into one and two contigs  
228 for sks048 and StAPkA1H1, respectively. Similarly, mitochondrial genome (MIT) contigs were  
229 assembled for all three draft assemblies; however, MIT circularisation also failed. Rather than a  
230 single sequence, MIT resolved into four, three and one contigs for StAPkA1H1, sks047 and sks048,  
231 respectively. All three isolates had reads that span the full-length API and MIT length, though sks047  
232 had <10-fold input read coverage for API, which may have hindered the assembler’s ability to resolve  
233 into contigs.

234 In contrast, API coverage for StAPkA1H1 and sks048 was up to 108x, while MIT coverage for all three  
235 isolates was between 292x and 713x. Comparisons with the PKNH reference genome excludes both  
236 extranuclear genomes.

237

## 238 *Chromosome structure*

239 Dot plots of draft genome alignment with the PKNH reference shows that the three draft genomes  
240 are syntenic with the PKNH reference genome regardless of gaps present in the genomes generated  
241 from patient isolates (SI Fig 3). The unplaced sequences in the 00 'bin' chromosomes account for at  
242 least 40% of gaps in the three draft genomes (**Error! Reference source not found.**). Indeed, each  
243 draft genome's chromosome structure conforms to that of the PKNH reference genome with  
244 uniform coverage across the chromosomes in regions with no gaps (SI Fig 4). This is also apparent in  
245 fragmented chromosomes, which retain the same chromosomal structure as PKNH (SI Fig 5). While  
246 coverage remains largely uniform, structural variations (>10kb), for example, duplications and  
247 inversions, are present in the AM-F assemblies as seen in duplications present in multiple  
248 chromosomes in sks047 and sks048 (SI Fig 4B).

249 Additionally, inversions are present in almost every chromosome, often as inverted duplicate  
250 sequences, with the most striking instance observed in chromosome 5 of sks048 (SI Fig 4A iii) where  
251 multiple duplicated inversions are observed. Frameshifts, are present across chromosomes in all of  
252 the draft genomes (SI Fig 4B). Given the robust clinical isolate draft genome assembly, the  
253 frameshifts observed deserve further investigation. Associated gaps do not appear to have  
254 impacted the distribution of genes within the draft genomes (Fig 2). Mean annotated gene density  
255 shows the PKNH reference genome to have 22.05 genes per 100kbp, StAPkA1H1 to have 18.15,  
256 sks047 to have 20.25 and sks048 with 19.80 (Fig 2). Increased gene density may be achieved with  
257 manual pseudogene curation since mean gene density is inversely correlated with the number of  
258 pseudogenes (Table 2).

259

260 **Fig 2.** Gene density plots for the *P. knowlesi* PKNH reference genome, StPka1H1, sks047 and sks048  
261 draft genomes. Gene density is calculated based on the number of identified genes within a sliding  
262 window of 100kb. Mean density shows the PKNH reference genome to have 22.05 genes per 100kb,  
263 StAPkA1H1 to have 18.15, sks047 to have 20.25 and sks048 with 19.8. Plots were generated using  
264 karyoploteR [40].

265

266 With the exception of the *SICAv* Type 1, *SICAv* gene fragments and the *KIR* genes, analysis of the  
267 other multigene families reveals similar retention copy number in the three draft genomes and the  
268 PKNH reference (Table 3). Given the high similarity between the experimental lines StAPkA1H1 and  
269 PKNH in dotplots and other analyses (SI Fig 2A, SI Fig 3A) the expanded number of *KIR* genes in two  
270 different laboratory passaged lines, compared with clinical isolates, may reflect gene retention

271 through passive artificial passage. Clinical isolates are effectively wild-type *P. knowlesi* and the lower  
 272 *KIR* gene copy number in clinical isolates may reflect recombination and selection pressure in  
 273 mosquito transmission in nature. Chromosomal positional analyses of the *KIR* genes show varied  
 274 distribution across chromosomes and that only three *KIR* genes were represented in chromosome 00  
 275 in the clinical isolates sks047 and sks048 draft genomes supports the constrained *KIR* gene copy  
 276 number in nature (SI Fig 6). *SICAvar* genes appear to be distributed across the genome,  
 277 chromosomes, including the chromosomal extremities with more members annotated than  
 278 previously reported by Pain et al. (2008), particularly on chromosomes 10, 11 and 12 (SI Fig 7).

**Table 3 Number of annotated protein copies of the multigene families identified.**

| <i>Genes</i>                                                                                 | <i>Abbr.</i>                    | <i>PKNH</i> | <i>StAPkA1H1</i> | <i>sks047</i> | <i>sks048</i> |
|----------------------------------------------------------------------------------------------|---------------------------------|-------------|------------------|---------------|---------------|
| <i>Circumsporozoite protein</i>                                                              | <i>CSP/CS-TRAP</i>              | 2           | 2                | 2             | 2             |
| <i>Cytoadherence linked asexual protein/gene</i>                                             | <i>CLAG</i>                     | 2           | 2                | 2             | 2             |
| <i>Duffy binding/Duffy-antigen protein [ Erythrocyte binding protein (alpha/beta/gamma)]</i> | <i>DBP/DaBP [ ERYBP(a/b/g)]</i> | 3           | 3                | 3             | 3             |
| <i>Early transcribed membrane protein</i>                                                    | <i>ETRAMP</i>                   | 9           | 9                | 9             | 9             |
| <i>Knob-associated histidine-rich protein</i>                                                | <i>KAHRP</i>                    | 1           | 1                | 1             | 1             |
| <i>Knowlesi Interspersed Repeats (-like)</i>                                                 | <i>KIR/KIRL</i>                 | 70          | 65               | 28            | 30            |
| <i>Merozoite surface protein</i>                                                             | <i>MSP</i>                      | 13          | 10               | 10            | 10            |
| <i>Multidrug resistance (-associated protein)</i>                                            | <i>MDRP/MDRaP</i>               | 4           | 3                | 3             | 3             |
| <i>Reticulocyte binding protein</i>                                                          | <i>Pknbp/rbp</i>                | 2           | 2                | 2             | 2             |
| <i>Sporozoite invasion-associated protein</i>                                                | <i>SPIAP</i>                    | 2           | 2                | 2             | 2             |
| <i>Tryptophan-rich antigen</i>                                                               | <i>TrpRA</i>                    | 29          | 29               | 30            | 29            |
| <i>ATP-binding cassette (ABC) transporter</i>                                                | <i>ABCtrp</i>                   | 15          | 15               | 15            | 15            |
| <i>Apicomplexan Apetala2 transcription factor</i>                                            | <i>ApiAP2</i>                   | 29          | 28               | 28            | 28            |
| <i>Schizont-infected agglutination variant proteins</i>                                      | <i>SICAvar</i>                  | 109         | 206              | 124           | 160           |

Legend to Table 3: Annotated multigene families were identified within the associated generic feature (GFF) file of the PKNH reference genome (Pain et al., 2008) and the draft genomes StAPkA1H1 (experimental line) and sks047 and sks048 (both clinical isolates).

279

## 280 *Structural Variation*

281 Following filtering for length, quality and depth, reads-based structural variants (SVs) were called  
 282 using the ONT SV pipeline and assembly-based SVs were called using Assemblytics [41]. The reads-  
 283 based approach returned 1316 and 1398 SVs for sks047 and sks048, respectively (Table 4). The

284 assembly-based approach returned 856 and 839 SVs for *sks047* and *sks048*, respectively (Table 4).  
285 The reads-based approach is expected to return more variants due to a higher error rate in the raw  
286 reads used compared with the collapsed assembly-based methodology.  
287 SVs that exceeded the quality, length and read depth threshold are distributed across the genome  
288 on all chromosomes within coding and non-coding regions. Within the 101 shared SVs, 68 were  
289 within annotated genes, including within the *SICAv* and *KIR* multigene families (Supplementary  
290 Table 2).  
291 There were different variation signatures between the experimental line StAPkA1H1 compared with  
292 the two clinical isolates *sks047* and *sks048* (Fig 3). StAPkA1H1 had more tandem variants than the  
293 clinical isolates, *sks047* and *sks048*. In comparison the clinical isolates show more variation in their  
294 repeat sequences with similar insertion and deletion (red and blue) and repeat expansion and  
295 contraction (Green and Purple) signatures than StAPkA1H1 (Fig 3).

296

297 **Table 4 Summary of reads-based and assembly based structural variants**

| <i>Isolate</i> | <i>Total SVs</i> |                 | <i>Insertions</i> |                 | <i>Deletions</i> |                 |
|----------------|------------------|-----------------|-------------------|-----------------|------------------|-----------------|
|                | <i>Reads</i>     | <i>Assembly</i> | <i>Reads</i>      | <i>Assembly</i> | <i>Reads</i>     | <i>Assembly</i> |
| <i>sks047</i>  | 1316             | 856             | 564               | 396             | 752              | 460             |
| <i>sks048</i>  | 1398             | 839             | 667               | 480             | 731              | 359             |

298

299 Legend to table 4: Reads-based SV calling involved filtering draft genomes for quality, length and  
300 depth before aligning *sks047* and *sks048* input reads against the StAPkA1H1 genome using the  
301 Oxford Nanopore structural variant pipeline. Assembly-based structural variants were called using  
302 Assemblytics [41] by aligning the complete draft genomes of *sks047* and *sks048* against the  
303 StAPkA1H1 genome.

304

305 **Fig 3.** Assembly-based structural variation, size 50 – 10,000bp, of StAPkA1H1, *sks047* and *sks048* draft  
306 genomes against the PKNH reference genome [16]. Nucmer alignment was generated using  
307 parameters “—maxmatch -l 100 -c 500” with default and Assemblytics parameters [41]. Expansions  
308 (green and orange) refer to insertions that occur within repeat or tandem variants, while contractions  
309 (purple and brown) refer to deletions in these regions. More variation is present in the tandem  
310 variants (brown and orange) of StAPkA1H1 than those of the draft clinical isolate genomes, *sks047*  
311 and *sks048*. In comparison the clinical isolates show more variation in their repeat sequences with

312 similar insertion and deletions (red and blue) and repeat expansion and contraction (green and purple)  
313 signatures.

#### 314 *Gene duplication*

315 Gene duplication was quantified and classified using MCScanX [42]. All genes within the draft genomes  
316 for the StAPkA1H1 cultured line and sks047 and sks048 clinical isolates were classified as either:  
317 Singleton (no identified duplication; proximal (two identified duplicated genes with <20 genes  
318 between them); dispersed (>20 genes between the 2 candidate genes); tandem (duplication events  
319 next to each other) and segmental/ whole genome duplication (WGD) (>4co-linear genes with <25  
320 genes between them). To gain an insight into differences in the duplication types we classified  
321 duplication types for the *BUSCO* core eucaryotic core control gene population and the *PkSICAv* type  
322 1, *PkSICAv* type 2 and the *KIR* multiple gene families of interest in the three draft genomes  
323 StAPkA1H1, sks047 and sks048 (Fig 4). The duplication profile of the control population *BUSCO* genes  
324 was well matched for each draft genome and also to the *BUSCO* duplication profile for the PKNH  
325 reference genome (Mann–Whitney U test StAPkA1H1,  $p=0.92$ ; sks047,  $p=0.67$ ; sks048,  $p=0.66$ ; PKNH  
326  $p=0.40$ ). Therefore, there was no observed excess duplication types for *BUSCO* genes (Fig 4). However,  
327 duplication profiles for the genes annotated *SICAv* type 1, *SICAv* type 2 and *KIR* in the draft  
328 genomes, StAPkA1H1, sks047 and sks048, were markedly different from the *BUSCO* gene profiles with  
329 no evidence for singleton genes (Fig 4). When compared to 100 randomly obtained genes as a  
330 population this result profile was statistically significant (Mann–Whitney U test,  $p < 1.0e-9$ ).

331 **Fig 4.** Gene duplication classes for the draft genome assemblies for StAPkA1H1 (experimental line)  
332 and the clinical isolates sks047 and sks048. Gene duplication was quantified and classified by  
333 MCScanX [42] for all genes in each genome and identified as Singleton (no identified duplication),  
334 dark blue bars; proximal (two identified duplicated genes with <20 genes between them), grey bars;  
335 dispersed (>20 genes between the 2 candidate genes), orange bars; tandem (duplication events next  
336 to each other), yellow bars; and segmental/ whole genome duplication (WGD) (>4co-linear genes  
337 with <25 genes between them), light blue bars. The gene pools for each genome were divided into  
338 *BUSCO* (core genome genes) for comparison with the genes making up the *SICAv* type 1, or  
339 *SICAv* type 2 or *KIR* multiple gene families. The draft genomes, StAPkA1H1, sks047 and sks048, had  
340 roughly similar profiles for *BUSCO* genes. Singletons (blue bars) were absent from the multiple gene  
341 families for all of the draft genomes.

342

343

344 *Positive selection: nonsynonymous (dN)/synonymous (dS) substitutions.*

345 In order to determine if the *SICAv* type 1, *SICAv* type 2 and *KIR* genes are under selection  
 346 pressure the associated predicted proteins from each genome, StAPkA1H1, PKNH (Reference),  
 347 *sks047* and *sks048* were translated into amino acid sequence and clustered into putative  
 348 orthologous gene clusters containing *SICAv* type 1, or *SICAv* type 2 or *KIR* or *BUSCO* (control  
 349 group) using Orthofinder. The amino acid sequences were aligned and the alignments used to  
 350 “backtranslate” into nucleotide coding sequences. The mean dN/dS for *SICAv* type 1, *SICAv* type  
 351 2, *KIR* and *BUSCO* gene clusters was 2.40, 2.74, 2.35 and 0.35 respectively (Table 5 and SI Fig 8).  
 352 Clusters containing *SICAv* type 1, or *SICAv* type 2 or *KIR* genes had a statistically significant  
 353 greater mean dN/dS value when compared to *BUSCO* gene clusters (Wilcoxon rank sum test p-value  
 354 adjustment method Bonferroni: *SICAv* type 1, = 4.1e-08; *SICAv* type 2 = 0.0063 and *KIR*, p = 6.7e-  
 355 13).

356

357 **Table 5 Non-synonymous versus synonymous (dN/dS) analysis of *SICAv* type 1, *SICAv* type 2,**  
 358 ***KIR* and *BUSCO* gene clusters represented collectively in the StAPkA1H1, *sks047* and *sks048* draft**  
 359 **genomes and the PKNH Reference genome.**

360

| <i>Cluster group</i> | <i>Cluster count (n)</i> | <i>Mean dN/dS per cluster</i> | <i>Standard deviation</i> | <i>Median</i> | <i>Inter quartile range</i> |
|----------------------|--------------------------|-------------------------------|---------------------------|---------------|-----------------------------|
| <i>BUSCO</i>         | 153                      | 0.353                         | 0.723                     | 0.101         | 0.27                        |
| <i>SICAv</i> type 1  | 15                       | 2.4                           | 1.31                      | 2.37          | 1.86                        |
| <i>SICAv</i> Type 2  | 5                        | 2.74                          | 2.54                      | 1.83          | 4.02                        |
| <i>KIR</i>           | 26                       | 2.35                          | 1.19                      | 1.99          | 1.5                         |

361

362 Legend to Table 5: *SICAv* type 1, *SICAv* type 2, *KIR* genes and *BUSCO* (control groups) genes  
 363 were translated into amino acid sequence and clustered into orthologous groups using Orthofinder  
 364 [43]. The amino acid sequences were aligned and the alignments “backtranslated” into nucleotide  
 365 coding sequences for subsequent dN/dS analysis using Codophyml [44]. In order to avoid false  
 366 positive dN/dS results the nucleic acid alignment was filtered to dis-allow gaps, insertions and  
 367 deletions and the final filtered nucleotide alignments with three or more sequences per cluster, the  
 368 minimum requirement for Codophyml [44], was subjected to dN/dS analysis. *SICAv* type 1,  
 369 *SICAv* type 2 and *KIR* genes had a statistically significantly greater dN/dS value when compared to  
 370 *BUSCO* gene clusters (Wilcoxon rank sum test P value adjustment method Bonferroni: *SICAv* type  
 371 1, p = 4.1e-08; *SICAv* type 2 p = 0.0063 and *KIR*, p = 6.7e-13).

372

### 373 *Genomic organisation of suspected ‘weapon’ gene family members*

374 To determine if the gene families of interest: *PkSICAv* type 1, *PkSICAv* type 2 and the *KIR* genes,  
375 potential virulence or ‘weapon’ genes, are situated in gene sparse regions we quantified the distance  
376 from one gene to its neighbour in both a 3 prime (3’) and 5 prime (5’) direction, excluding genes at  
377 the start or end of a scaffold. The values were subjected to further analysis using the *BUSCO* results  
378 as a negative control (Fig 5A). With the exception of *SICAv* type 2 in the 3’ direction all ‘weapon’  
379 gene classes had a greater distance to their neighbouring genes in both the 3’ and 5’ direction. In the  
380 3’ direction: Kruskal-Wallis chi-squared = 272.15, df = 4, p-value < 2.2e-16. Wilcoxon signed-rank  
381 test, Bonferroni p-value adjustment in comparison to *BUSCO*: *SICAv* type 1 p = 2e-16, *SICAv* type  
382 2 p = 0.457 and *KIR* p = 1.1e-10. In the 5’ direction all genic distances for the genes of interest were  
383 significantly different to the *BUSCO* control population. Kruskal-Wallis chi-squared = 269.33, df = 4,  
384 p-value < 2.2e-16. Wilcoxon signed-rank test, Bonferroni p-value adjustment in comparison to  
385 *BUSCO*: *SICAv* type 1 p = 2e-16; *SICAv* type 2 p = 0.00123 and *KIR* p = 3.6e-09. Orthofinder gene  
386 cluster outputs were further visualised using “UpSets” to determine the membership of genes within  
387 each cluster (Fig 5B). The majority of all gene clusters were present in all isolates with the exception  
388 of *SICAv* type 1 gene clusters with 10 – 15 unique *SICAv* type 1 clusters per isolate. For *KIR* genes,  
389 the majority of clusters were shared between all isolates with the exception of a single unique *KIR*  
390 gene cluster in each of sk047 and sk048. The majority of *SICAv* type 2 genes were orthologues  
391 between all isolates with some not identified in sk047 and sk048 (Fig 5B).

392

393 **Fig 5.** Genomic organisation of ‘weapon’ gene family members. **Fig 5A** Heatmap gene  
394 density plots showing 5’ against 3’ intergenic distances (log10) for the draft genomes (i)  
395 StAPkA1H1 experimental line, (ii) clinical isolate sk047 and (iii) clinical isolate sk048. Gene  
396 density for intergenic distances is represented by colour scale ranging from black (low) to  
397 white (high, maximum of 60 genes per bin). Genes classed as *BUSCO* (green dots), *SICAv*  
398 type 1 (orange squares), *SICAv* type 2 (purple cross) and *KIR* (blue triangles) are shown.  
399 *SICAv* type 1 and *KIR* genes had a significantly greater distance to their neighbouring  
400 genes compared with the *BUSCO* genes (**Wilcoxon signed-rank test**, Bonferroni p-value  
401 adjustment, p<0.001) suggesting that these gene family members are in gene sparse  
402 regions. Genes situated at the start or end of scaffolds were rejected from the analysis. **Fig**  
403 **5B** Orthofinder gene cluster outputs were visualised using “UpSets” to determine the  
404 membership of genes between clusters in the PKNH reference genome [16] and the draft

405 genomes; StAPkA1H1 experimental line, clinical isolate sk047 and clinical isolate sk048. All  
406 gene clusters (i), all BUSCO gene clusters (ii), *SICAvar* type 1 gene clusters (iii) *SICAvar* type 2  
407 gene clusters (iv) and *KIR* gene clusters (v) are shown. The majority of all gene clusters were  
408 present in all isolates with the exception of *SICAvar* type 1 gene clusters with 10 – 15  
409 *SICAvar* type 1 clusters unique per isolate. For *KIR* genes, the majority of clusters were  
410 shared between all isolates with the exception of a single unique *KIR* gene cluster in each of  
411 sk047 and sk048. The majority of *SICAvar* type 2 genes were orthologues between all  
412 isolates with some not identified in sk047 and sk048.

413

#### 414 **Discussion**

415 Here we present *P. knowlesi* genome sequences assembled from long-read amplification-free  
416 sequencing outputs from clinical isolates, essentially wild-type *P. knowlesi*. The new genome  
417 sequences are robust and add context to our understanding of *P. knowlesi* genome structure,  
418 organisation and variability.

419 In the first instance we optimized a human leucocyte depletion method to generate high-quality  
420 parasite enriched DNA from clinical samples for PCR-free MinION ONT sequencing [45]. To control  
421 for our novel methodologies we sequenced the *P. knowlesi* A1-H.1 experimental line and used  
422 genome sequence data already available for this line for comparison [34].

423 Three *Plasmodium knowlesi* genomes were assembled *de novo* from ONT sequence data. Two from  
424 *P. knowlesi* clinical isolates (sks047 and sks048) and the other a control genome from the *P. knowlesi*  
425 A1-H.1 (StAPkA1H1) experimental line [46]. All three genomes were corrected, polished, and  
426 annotated with Racon, Medaka and Companion [47-49]. The clinical isolates sks047 and sks048 were  
427 also further corrected with Illumina short-reads using Pilon [50]. Comparison of the *de novo*  
428 StAPkA1H1 genome assembled here with the *P. knowlesi* A.1-H1 genome generated using Illumina  
429 and PacBio platforms [34] and the *P. knowlesi* reference genome PKNH [16] demonstrated that our  
430 sequencing platform and subsequent assembly pipeline produced robust and reliable *de novo P.*  
431 *knowlesi* genome sequences.

432 ONT long-read sequencing platforms alone can generate *de novo* genomes of good quality [51-53].  
433 However, using our low yield input DNA and in-house pipelines the ONT outputs required correction  
434 with high-quality Illumina short reads [17]. Similarly, Lapp et al. generated a reference genome from  
435 *P. knowlesi* clone Pk1 using PacBio sequence data that also required additional Hi-C scaffolding [30].  
436 ONT continuously upgrades both their software and hardware and the upgrades are expected to  
437 supersede the need for excessive additional correction. For example the recently launched ONT R10



438 flowcell minimises the inherent homopolymer error rate associated with long-read sequencing  
439 technologies [54] and ONT base-calling algorithms report a 32% read error rate reduction [55].  
440 The two clinical isolates (sks047 and sks048) and the control (StAPkA1H1) resolved into 14  
441 chromosomes as expected for *Plasmodium* spp. and one 'bin' 00 chromosome. The PKNH reference  
442 genome also resolves into 14 chromosomes and one bin chromosome where 1.73% of the total  
443 sequence comprising 62 genes were assigned [16]. The bin chromosomes (chr00) of StAPkA1H1,  
444 sks047 and sks048 contain 1.59%, 2.09% and 1.94% total sequence length with 18, 35 and 25 genes  
445 respectively. Sequences placed in chr00 were unable to pass alignment quality thresholds for  
446 placement in chromosomes 1-14. For example, when aligned with minimap2 in D-GENIES to produce  
447 dotplots, StAPkA1H1 chr00 sequences tended to cluster with PKNH chr00 both representing *P.*  
448 *knowlesi* experimental lines. Failure of sequences to pass quality thresholds would be expected to be  
449 randomly distributed genome-wide as observed in sks047 and sks048 chr00 sequences. The  
450 observed clustering of StAPkA1H1 chr00 to PKNH chr00 is difficult to explain. It is possible that  
451 RagTag may be overriding 'de novo' chromosome structuring and 'forcing' StAPkA1H1 contigs into a  
452 chr00 to fit the pattern set by the PKNH reference genome. Such clustering may be improved by  
453 separating the de-chimerisation feature from the scaffolding feature of RagTag and only using the  
454 ABACAS feature in Companion to scaffold the contigs. However, both ABACAS and Companion rely  
455 on reference-guided chromosome structuring that may also produce similar clustering [37, 48].  
456 During chromosome structuring, we found the minimap2 alignment function of RagTag was unable  
457 to resolve chimeric contigs for sks047, sks048 and StAPkA1H1, perhaps, as a function of the  
458 algorithm heuristics in minimap2 or localised flaws in our pipeline. Consequently, sections of sks047  
459 chromosomes 02 and 03, which were incorrectly placed in chromosomes 14 and 13 due to chimeric  
460 contigs, were successfully corrected using the nucmer aligner function of RagTag.  
461 In general, RagTag struggled to resolve regions of low complexity and high variability, such as  
462 telomeric regions. Otto et al., 2018 report that Companion could construct *Plasmodium*  
463 chromosomes in their entirety [21]. Indeed, some telomeric sequences were resolved in our *de novo*  
464 reference genomes from the clinical isolates, including telomeric sequences identified by Lapp et al.  
465 [30]. Furthermore, we report predicted genes within these telomeric regions including some  
466 members of the *SICAvar* gene family. More strikingly the *Duffy-binding protein* and *TrpRA* genes are  
467 almost exclusively located at the extreme ends of the *de novo* assembled chromosomes.  
468 Our methods were unable to resolve the apicomplast (API) and mitochondrial (MIT) extra-  
469 chromosomal genomes completely. In nature, these genomes appear to be circular and possess  
470 sequence arrangement that includes a single origin of replication [34]. Our methods may not have  
471 disassociated multiple copies of both genomes into single circular API and MIT genomic units. With

472 the exception of the sks047 apicomplast, API and MIT reads were resolved into large contigs with  
473 overlapping regions of the same sequence, particularly sks047 MIT.

474 The genomes interrogated in this study have roughly the same gene - duplication composition as  
475 each other, except for the clinical isolate sk047 which did not have any identified segmental whole  
476 genome duplications, in contrast to isolate sks048, where 0.28% of genes were identified as  
477 segmental. Assembly error can occur when one assembly “over” collapses similar regions, mistaking  
478 them for haplotigs, or even outputting excess haplotigs inflating the size or number of segmental  
479 duplications. The sk047 and sk048 *de novo* genomes were assembled in exactly the same manner  
480 which reduces the probability that this result is an artifact of assembly error. The experimental line,  
481 StAPkA1H1, genome had the greatest segmental classed genes (0.63%). It is tempting to speculate  
482 that this level of duplication may be the result of many years of less constrained asexual  
483 reproduction in tissue culture, reflecting the absence of recombination events during mosquito  
484 transmission and vertebrate host-driven selection pressure experienced by wild-type parasites  
485 circulating in nature.

486 We compared the duplication profiles for *SICAvar* type 1, *SICAvar* type 2 and *KIR* gene families, gene  
487 families that code for parasite proteins expressed on the surface of infected host red blood cells and  
488 that interface with the host, with duplication profiles of the BUSCO genes responsible for normal  
489 internal parasite cellular functions. *SICAvar* type 1, *SICAvar* type 2 and *KIR* protein products are  
490 antigenically variable and implicated in virulence and are potential “parasite weapons” that require  
491 protection from host defence responses. In all of the draft genomes analysed each *SICAvar* type 1,  
492 *SICAvar* type 2 and *KIR* gene population had a significantly different duplication profile when  
493 compared with 100 randomly selected genes (Mann-Whitney U test:  $p < 0.001$ ). This suggests that  
494 the parasite genome tolerates high levels of duplication at these loci to allow variation, parasite  
495 survival and evolution in a hostile host environment. BUSCO core eukaryotic genes are not thought  
496 to be under undue selection pressure and were used here as a control gene set to investigate  
497 selection pressure. Following gene clustering and dN/dS analysis, clusters which contained *SICAvar*  
498 type 1, *SICAvar* type 2 and *KIR* genes had a statistically significantly higher dN/dS values when  
499 compared to BUSCO clusters. Non-synonymous substitution over synonymous substitution (dN/dS)  
500 values greater than 1.0 are thought to show positive selection pressure. The mean dN/dS for *SICAvar*  
501 type 1 gene clusters was 1.31, for *SICAvar* type 2 clusters, 2.54 for *KIR* gene clusters 1.19 while  
502 dN/dS for BUSCO gene clusters was 0.35 suggesting that the *SICAvar* type 1, *SICAvar* type 2 and *KIR*  
503 gene populations are under strong positive selection pressure. Given that the protein products of  
504 these multiple gene family members are expressed at the forefront of parasite host interactions this  
505 finding, in addition to multiple copy number within the gene families, would accommodate antigenic

506 variability and makes biological sense by increasing the chance of parasite survival in a hostile host  
507 environment.

508 We then investigated genomic organisation of parasite ‘weapon’ genes to determine if these are  
509 located in gene sparse or gene dense regions. With the exception of *SICAvar* type 2 in the 3’  
510 direction, the weapon gene family members had statistically significant greater distances to their  
511 neighbouring genes in both the 3’ and 5’ directions compared with BUSCO genes. This suggests that  
512 the parasite ‘weapon’ genes are located in gene sparse regions, a genomic arrangement similar to  
513 plant pathogens, for example nematodes (Eves van den Akker *et al.*, 2016), aphids (Thorpe *et al.*,  
514 2018), phytophthora (Haas *et al.*, 2009; Thorpe *et al.*, 2021) and fungi (Dong *et al.*, 2015). The ability  
515 to tolerate certain genes, *SICAvar* type 1 and *KIR* gene family members in gene sparse, transposon  
516 and repetitive rich regions allows the parasite to generate antigenic variability at these important  
517 loci while reducing the probability of impacting essential core gene function. The process of genomic  
518 regions generating more variation than others is poorly understood, but is termed “the two speed  
519 genome” in the field of plant pathogens. In *Plasmodium falciparum*, *Pfemp* 1 gene family members  
520 tend to be located in chromosomal sub-telomeric regions. Telomers are unstable with greater rates  
521 of recombination in comparison to centromeric regions and this particular location is used to explain  
522 the capacity for accruing multiple gene family members and antigenic variability in *P. falciparum*  
523 [21].

524 Following clustering of all genes into their putative orthologous clusters and UpSet visualisation we  
525 observed that orthologous versions of *SICAvar* type 1 genes are rarely found in all isolates. With the  
526 exception of the PKNH reference genome ([16] where the *SICAvar* gene family members were not  
527 well resolved, each of the draft genomes assembled here had between 10 and 15 unique *SICAvar*  
528 type 1 gene clusters indicating *SICAvar* type 1 genetic divergence. Indeed, only two *SICAvar* type 1  
529 gene-clusters were shared. The *KIR* genes were less divergent with only one unique gene- cluster in  
530 sk048 and in sk047 with most *KIR* gene clusters common between clinical isolates and experimental  
531 lines.

532 The ability to generate variation and maintain fitness is fundamental to the pathogen - host  
533 interactions. The pathogen needs to fulfil a successful life span to replicate and disseminate. If the  
534 host wins the host pathogen battle, then this marks the end of any particular pathogen germ-line.  
535 The ability to generate diversity within the pathogen ‘weapon’ genes increases the chance of  
536 pathogen survival. The strong signatures of positive selection pressure and gene duplication on the  
537 *P. knowlesi SICAvar* type 1, *SICAvar* type 2 and *KIR* genes irrefutably demonstrate their importance in  
538 the fitness and evolution of this particular pathogen.

539 Here we demonstrate the utility of accessible, portable and affordable PCR-free long-read ONT  
540 MinION sequencing to *de novo* assemble *Plasmodium* genomes from very small archived clinical  
541 samples. The methods developed provide an opportunity to decrease our reliance on experimental  
542 lines to generate data from clinical isolates, in close to real time, and unlock the secrets held in  
543 essentially wild-type parasite genomes. The new *P. knowlesi* genomes from clinical isolates presented  
544 here provide an important insight into contemporary *P. knowlesi* isolates in Malaysian Borneo and the  
545 degree of positive selection exerted, genome wide, on malaria parasites. *P. knowlesi* is a zoonotic  
546 infection that is associated with severe and fatal disease and is currently the most prevalent type of  
547 malaria causing disease in Malaysia [9]. The *de novo* genomes represent the two dimorphic forms of  
548 *P. knowlesi* associated malaria in Malaysian Borneo [17] with some evidence for differential  
549 association with disease severity between clusters [35, 56]. On that backdrop the clinically relevant *de*  
550 *novo* genomes will provide an important resource for groups, including ours, reliant on signatures of  
551 *P. knowlesi* genome-wide diversity to take forward important research on *P. knowlesi*, from  
552 evolutionary biology, zoonotic disease transmission to allelic associations with disease.

553

## 554 **Materials and Methods**

### 555 *Sample selection*

556 *P. knowlesi* DNA extracted from clinical samples collected with informed consent as part of a non-  
557 interventional study were used [35]. The isolates were selected to represent each of the two  
558 genetically distinct clusters KH273 (sks047) and KH195 (sks048) of *P. knowlesi* infecting patients in the  
559 study cohort [17, 35]. Control *P. knowlesi* DNA was extracted from the experimental line *P. knowlesi*  
560 A1-H.1 adapted to *in vitro* culture in human erythrocytes and kindly donated by Robert Moon [46]. In  
561 order to distinguish the genome data generated here for *P. knowlesi* A1-H.1 from that already existing  
562 we use the unique acronym, StAPkA1H1 [34, 57].

### 563 *Plasmodium DNA extraction*

564 Human DNA was depleted from 200 – 400µL thawed clinical samples using a previously described  
565 method [45]. Briefly, surviving human leucocytes in thawed samples were removed using anti-human  
566 CD45 DynaBeads (ThermoFisher Scientific). The resulting parasite pellet was washed to remove  
567 soluble human DNA (hDNA), and parasite enriched DNA (pDNA) was extracted using the QIAamp  
568 Blood Mini Kit (QIAGEN) with final elution into 150µL AE Buffer. DNA concentrations were quantified  
569 using the Qubit 2.0 fluorometer (Qubit™, Invitrogen) and real-time qPCR on RotorGene (QIAGEN).  
570 Recovered DNA was concentrated, and short fragments were removed by mixing 1:1 by volume with  
571 AMPureXP magnetic beads (Beckman Coulter) following the manufacturer's instructions. Briefly, the  
572 AMPureXP bead mixture was placed in a magnetic field and DNA bound to the beads was rinsed twice

573 with 70% ethanol before air drying to allow residual ethanol to evaporate. Parasite enriched DNA was  
574 eluted in 10uL nuclease-free H<sub>2</sub>O (Ambion). One µl of recovered DNA concentrate was used for DNA  
575 quantification using Qubit Fluorimetry (ThermoFisher Scientific) and 7.5µl taken forward for  
576 sequencing library preparation.

577

#### 578 *Library preparation and Sequencing*

579 Parasite enriched DNA was sequenced using the Oxford Nanopore Technologies (ONT) MinION long-  
580 read sequencing platform. Library preparations were selected to suit PCR-free sequencing for the  
581 small pDNA quantities available to study (~400ng). Sequencing libraries were prepared following the  
582 manufacturer's instructions for the SQK-RBK004 ONT sequencing kit. Sequencing was performed  
583 using R9.4.1 flowcells or R10 flowcells [45]. Previously sequenced Illumina reads for the patient  
584 isolates (sks047 and sks048) were retrieved from the European Nucleotide Archive, with accession  
585 codes ERR366425 and ERR274221, respectively [17]. Further short-read sequencing was carried out  
586 on PCR-enriched DNA using the Illumina MiSeq platform at the London School of Hygiene and Tropical  
587 Medicine and methods established by Diez Benavente et al., [58].

#### 588 *Reference Genomes*

589 For chromosome scaffolding and quality assessment comparison, the *P. knowlesi* PKNH reference  
590 genome [16] (version 2) was downloaded from Sanger  
591 (<ftp://ftp.sanger.ac.uk/pub/genedb/releases/latest/Pknowlesi/#>). In addition, further comparisons  
592 were carried out using the *P. knowlesi* PkA1H1 reference genome [34] from NCBI [accession code:  
593 GCA\_900162085].

#### 594 *De novo genome Assembly*

595 MinION FAST5 file outputs were locally base called using the high accuracy model of the guppy  
596 basecaller (v4.0.15; Ubuntu 19.10; GTX1060) with the following parameters: ``-r -v -q 0 --qscore-  
597 filtering -x auto``. Demultiplexing was carried out using qcat software (v1.1.0) with the ``--detect-  
598 middle --trim -k --guppy`` parameters, then adapter removal with porechop (v0.2.4) using default  
599 parameters and the most recent versions released from ONT technologies. Human DNA (hDNA)  
600 contamination was removed from the adapter-free reads by alignment against the human  
601 GRCh38.p13 reference genome (retrieved from NCBI accession code: GCF\_000001405.39) [59] using  
602 minimap2 (v2.17); [60] with ``-ax map-ont`` default parameters. Unmapped reads were separated  
603 from the binary sequence alignment (BAM) file with samtools (v1.10; [61, 62] and converted back to  
604 FASTQ by bedtools (v2.29.2) [63] for *de novo* genome assembly using Flye, (v2.8.1) [64] with an  
605 expected genome size of 25Mb and ``--nano-raw`` default parameters. Successful assemblies were

606 assessed for contamination using BlobTools (v1.0.1) [65]. Contigs not taxonomically assigned as  
607 Apicomplexan were discarded.

608

### 609 *Assembly Polishing and Correction*

610 Draft assemblies were polished using four iterations of racon (v1.4.13) [49]; in the default setting  
611 retaining raw long-read isolate sequence reads which did not align to the human GRCh38.p13  
612 (henceforth parasite-reads). As part of the polishing step, alignments of parasite-reads against the  
613 draft assembly were performed with minimap2 (v2.17; [60]). A consensus sequence was  
614 subsequently generated from the racon output using medaka (v1.0.3; default settings) [47]. Further  
615 polishing and correction was carried out using Illumina paired-end reads where available, using three  
616 iterations of pilon (v1.23) default parameters with ``-Xmx120G, --tracks, --fix all, circles`` [50].

### 617 *Masking repetitive elements*

618 The *P. knowlesi* PKNH reference mitochondrial (MIT) and apicoplast (API) sequences were extracted  
619 and individually aligned against draft *P. knowlesi* assemblies using MegaBLAST (v.2.9; default  
620 parameters) [16, 66]. Contigs which aligned to the reference PKNH MIT and API genomes were  
621 subsequently removed and circularised on Circlator (v1.5.5) [67] with the command ``circlator all --  
622 data_type nanopore-raw --bwa_opts "-x ont2d" --merge_min_id 85 --merge_breaklen 1000``.  
623 API/MIT-free draft assemblies (henceforth AM-F assemblies) were taken forward through  
624 RepeatModeler (v1.0.10) [68] and the outputs utilised as input for Censor [69] where the options  
625 ``Eukaryota`` and ``Report simple repeats`` were selected. Identified transposable elements and repeats  
626 in the censor outputs were classified based on the class of repeats to make a repeat library for each  
627 AM-F assembly. Repeat libraries of each AM-F assembly were combined and misplaced, redundant,  
628 sequences removed with CD-HIT (v4.8.1; ``-c 1.0 -n 10 -d 0 -g 1 -M 60000`` parameters) [70, 71]. This  
629 generates a singular 'master' repeat library encompassing the non-redundant list of identified  
630 elements across the three AM-F assemblies.

631 With the master repeat library, RepeatMasker (v4.0.7) was run on each AM-F assembly producing a  
632 tab-separated value (TSV) output of the identified repeats in the assembly. Then, using 'One Code to  
633 Find Them All' (OCFTA) [72], each TSV file was parsed to clarify further repeat positions found by  
634 RepeatMasker. Next, the LTRHarvest [73] module of GenomeTools (v1.6.1) [74] was used to find  
635 secondary structures of long terminal repeats (LTRs) and other alternatives in the AM-F assemblies.  
636 Here, the `'suffixerator'` function was implemented with ``-tis -suf -lcp -des -ssp -sds -dna`` parameters  
637 while the `'ltrharvest'` function was run with ``-mintsd 5 -maxtsd 100`` parameters. Concurrently,  
638 TransposonPSI was also used on the AM-F assemblies with default parameters to find repeat  
639 elements based on their coding sequences.

640 Redundant repeat element sequences were removed from the outputs of RepeatMasker, OCTFA,  
641 LTRHarvest and TransposonPSI using a custom script, to generate a genome feature file (GFF3)  
642 where each transposable and repetitive element of each AM-F assembly is represented once. Then,  
643 within each draft assembly, repeat elements were masked using the coordinates present in the non-  
644 redundant GFF3 file and the '*maskfasta*' function of bedtools (v2.27; default settings and '*-soft*').

#### 645 *Prediction and Annotation*

646 The masked AM-F assemblies were checked for chimeric contigs using Ragtag (v1.0.1) [75] where  
647 both the '*correct*' and '*scaffold*' functions were run with the '*--debug --aligner nucmer --nucmer-*  
648 *params='-maxmatch -l 100 -c 500'*' parameters [61, 62].

649 With the chimeric contigs broken, masked AM-F assemblies were uploaded on the Companion  
650 webserver [48] for gene prediction and annotation using the sequence prefix of 'PKA1H1\_STAND' for  
651 the cultured experimental line (StAPKA1H1) and 'PKCLINC' for patient isolates (sks047 and sks048).  
652 Companion software was run with no transcript evidence, 500bp minimum match length and 80%  
653 match similarity for contig placement, 0.8 AUGUSTUS [76] score threshold and taxid 5851.

654 Additionally, pseudochromosomes were contiguated, reference proteins were aligned to the target  
655 sequence, pseudogene detection was carried out, and RATT was used for reference gene models.

#### 656 *Comparative Genomics, Quality Assessment and Analyses*

657 As the pipeline progressed, assembly metrics were checked with assembly-stats (v1.0.1) and  
658 pomoxis (v0.3.4). Additionally, draft genomes were further assessed for completeness and accuracy  
659 using BUSCO(v5.0) with '*-l plasmodium\_odb10 -f -m geno --long*' parameters [77]. GFF3 files  
660 generated on Companion were parsed for genes of interest, including multigene families known to  
661 span the core genome and telomeric regions. Chromosomes of the annotated AM-F draft genomes  
662 were individually aligned against the corresponding *P. knowlesi* PKNH reference chromosome [16]  
663 with minimap2 parameters '*-ax asm5*'. Resulting alignment files were analysed on Qualimap  
664 (v.2.2.2) [78] with parameters '*-nw 800 -hm 7*'. Gene density, chromosome structure and multigene  
665 family plots were generated using the karyoploteR visualisation package [40]. Dotplots to identify  
666 repetitions, breaks and inversions were generated from minimap2 whole genome alignments using  
667 D-GENIES default settings [79].

#### 668 *Structural Variant Analyses*

669 The StAPkA1H1 draft genome, assembled here, was used as the reference for structural variant  
670 calling and subsequent variant annotation to ensure parity across sequencing technologies. Read  
671 alignment-based structural variant calling (henceforth reads-based) was achieved using the Oxford  
672 Nanopore structural variation pipeline (ONTSVP) ([https://github.com/nanoporetech/pipeline-](https://github.com/nanoporetech/pipeline-structural-variation)  
673 [structural-variation](https://github.com/nanoporetech/pipeline-structural-variation)) while the assembly-based approach was completed with Assemblytics [41].

674 Using a modified Snakefile, FASTQ isolate parasite-reads and the StAPkA1H1 draft genome; the  
675 ONTSVP first parses the input reads using catfishq (<https://github.com/philres/catfishq>) and seqtk  
676 (<https://github.com/lh3/seqtk>) before carrying out alignment using Ira with parameters ``-ONT -p s``  
677 [80]. The resulting alignment file was sorted and indexed with samtools and read coverage was then  
678 calculated using mosdepth (``-x -n -b 1000000``) [81]. Structural variants (SV) were called by cuteSV  
679 [82] with parameters ``--min-size 30 --max-size 100000 --retain_work_dir --report_readid --`  
680 `min_support 2``. Variants were subsequently filtered for length, depth, quality, and structural variant  
681 type (SVTYPE) such as insertions (INS) by default, before filtered variants were sorted and indexed.  
682 Failed SV types were manually filtered based on length and quality alone to determine the presence  
683 of high-quality, low-occurrence variants.

684 For the assembly-based structural variant calling for the clinical isolates sks047 and sks048 and  
685 StAPkA1H1 draft genomes were aligned against the PKNH reference genome [16] using nucmer with  
686 ``--maxmatch -l 100 -c 500`` parameters and outputs uploaded onto Assemblytics  
687 (<http://assemblytics.com>) [41] with default parameters and a minimum SV length of 30bp. BEDfile  
688 outputs of Assemblytics were converted to variant call format (VCF) file using SURVIVOR (v1.0.7)  
689 [83]. VCF files for successful reads-based and assembly-based SV calling as well as the failed SV-type  
690 VCF files were further filtered to remove any variants less than 50bp in length and less than Q5 in  
691 quality using a bcftools one-liner (<https://github.com/samtools/BCFtools>). A quality filter was not  
692 applicable for the assembly-based approach due to the lack of quality information in the original  
693 BEDfile output of Assemblytics. Variants exceeding these thresholds were annotated with vcfanno  
694 (v0.3.2) [41] and subsequently sorted and indexed. Annotated variants, relevant BAM alignment files  
695 and GFF files were visualised on IGV [84]. Using IGV, a gene locus previously identified to be  
696 associated with dimorphism – *PknbpXa* [17]—was analysed to determine the presence of structural  
697 variants. Summary statistics were calculated using the 'stats' function of SURVIVOR with parameters  
698 ``-1 -1 -1``. VCF files were compared using the 'isec' function of bcftools with default settings,  
699 including analyses of the variants present within genes.

#### 700 *Duplication, clustering, genomic organisation and dN/dS analyses*

701 Scripts used can be found here: [https://github.com/peterthorpe5/plasmidium\\_genomes](https://github.com/peterthorpe5/plasmidium_genomes). Gene  
702 duplication analyses were performed using the similarity searches from DIAMOND-BlastP (1e-5) with  
703 MCSanX toolkit[42]. Orthologues clustering and dN/dS was performed as described in [43]. Briefly,  
704 Orthofinder (v2.2.7) [85] was used to cluster all the amino acids sequences for the genomes used in  
705 this study. The resulting sequences from the clusters of interest were aligned using MUSCLE  
706 (v3.8.1551) [86] and refined using MUSCLE. The resulting amino acid alignment was used as a  
707 template to back-translate the nucleotide coding sequence using Biopython for subsequent



708 nucleotide alignment [87]. The nucleotide alignment was filtered to remove any insertions and  
709 deletions and return an alignment with no gaps using trimAL (v1.4.1)[88]. The resulting alignment  
710 was subjected to dN/dS analysis using CodonphymI (v1.00 201407.24) (-m GY --fmodel F3X4 -t e -f  
711 empirical -w g -a e ) [44]. Genomic organisation of classes of genes of interest was performed as  
712 described in [43, 89, 90]. For UpSet visualization the scripts can be found in the github link above.

713

#### 714 **Author Contributions**

715 *DRO, data curation, formal analyses, investigation, methodology, visualization; PT, formal analyses,*  
716 *software, investigation, supervision; EDB, Supervision; SC, resources; FM, Resources; RM, Resources,*  
717 *editing; TGC, supervision, draft editing; JCS, conceptualization, funding acquisition, methodology,*  
718 *project administration, resources, supervision, writing preparing draft.*

719

#### 720 **Acknowledgements**

721 We would like to acknowledge Dr Joseph Ward for help with software and resources and Dr Fiona  
722 Cook for providing resources for optimising methodologies.

723

#### 724 **Funding**

725 DRO is supported by the Wellcome Trust ISSF award 204821/Z/16/Z. Bioinformatics and  
726 computational biology analyses were supported by the University of St Andrews Bioinformatics Unit  
727 (AMD3BIOINF), funded by Wellcome Trust ISSF award 105621/Z/14/Z and 204821/Z/16/Z. The  
728 sample BioBank was compiled with informed consent (Medical Research Council, [www.mrc.ac.uk](http://www.mrc.ac.uk),  
729 grant G0801971). Genome sequencing was supported by Tenovus Scotland (T16/03). TGC is funded  
730 by the Medical Research Council UK (Grant no. MR/M01360X/1, MR/N010469/1, MR/R025576/1,  
731 and MR/R020973/1) and BBSRC (Grant no. BB/R013063/1). SC is funded by Medical Research  
732 Council UK grants (ref. MR/M01360X/1, MR/R025576/1, and MR/R020973/1).

733

#### 734 **Data availability**

735 Genomes are in the process of being deposited in NCBI. Raw reads associated with these genomes  
736 are also deposited under the same accession number. Scripts used to generate the data in this  
737 project are available in github:

738 [https://github.com/damioresgun/Pknowlesi\\_denovo\\_genome\\_assembly\\_and](https://github.com/damioresgun/Pknowlesi_denovo_genome_assembly_and)

739 [https://github.com/peterthorpe5/plasmidium\\_genomes](https://github.com/peterthorpe5/plasmidium_genomes).

740

#### 741 **References**

- 742 1. Knowles R, Gupta BMD. A Study of Monkey-Malaria, and Its Experimental Transmission to  
743 Man. *Ind Med Gaz.* 1932;67(6):301-20. Epub 1932/06/01. PubMed PMID: 29010910; PubMed Central  
744 PMCID: PMC5231565.
- 745 2. Butcher GA, Mitchell GH. The role of *Plasmodium knowlesi* in the history of malaria research.  
746 *Parasitology.* 2018;145(1):6-17. Epub 2016/11/11. doi: 10.1017/S0031182016001888. PubMed PMID:  
747 27829470.
- 748 3. Galinski MR, Lapp SA, Peterson MS, Ay F, Joyner CJ, KG LER, et al. *Plasmodium knowlesi*: a  
749 superb in vivo nonhuman primate model of antigenic variation in malaria. *Parasitology.*  
750 2018;145(1):85-100. Epub 2017/07/18. doi: 10.1017/S0031182017001135. PubMed PMID: 28712361;  
751 PubMed Central PMCID: PMC5798396.
- 752 4. Pasini EM, Zeeman AM, Voorberg VANDERWA, Kocken CHM. *Plasmodium knowlesi*: a relevant,  
753 versatile experimental malaria model. *Parasitology.* 2018;145(1):56-70. Epub 2016/12/13. doi:  
754 10.1017/S0031182016002286. PubMed PMID: 27938428.
- 755 5. Chin W, Contacos PG, Coatney GR, Kimball HR. A Naturally Acquired Quotidian-Type Malaria  
756 in Man Transferable to Monkeys. *Science.* 1965;149(3686):865. Epub 1965/08/20. doi:  
757 10.1126/science.149.3686.865. PubMed PMID: 14332847.
- 758 6. Chin W, Contacos PG, Collins WE, Jeter MH, Alpert E. Experimental mosquito-transmission of  
759 *Plasmodium knowlesi* to man and monkey. *Am J Trop Med Hyg.* 1968;17(3):355-8. Epub 1968/05/01.  
760 doi: 10.4269/ajtmh.1968.17.355. PubMed PMID: 4385130.
- 761 7. Singh B, Kim Sung L, Matusop A, Radhakrishnan A, Shamsul SS, Cox-Singh J, et al. A large focus  
762 of naturally acquired *Plasmodium knowlesi* infections in human beings. *Lancet.* 2004;363(9414):1017-  
763 24. Epub 2004/03/31. doi: 10.1016/S0140-6736(04)15836-4. PubMed PMID: 15051281.
- 764 8. World-Health-Organization. World Malaria Report 2019. Geneva: 2019 Licence: CC BY-NC-SA  
765 3.0 IGO.
- 766 9. Chin AZ, Maluda MCM, Jelip J, Jeffree MSB, Culleton R, Ahmed K. Malaria elimination in  
767 Malaysia and the rising threat of *Plasmodium knowlesi*. *J Physiol Anthropol.* 2020;39(1):36. Epub  
768 2020/11/25. doi: 10.1186/s40101-020-00247-5. PubMed PMID: 33228775; PubMed Central PMCID:  
769 PMC57686722.
- 770 10. Cox-Singh J, Davis TM, Lee KS, Shamsul SS, Matusop A, Ratnam S, et al. *Plasmodium knowlesi*  
771 malaria in humans is widely distributed and potentially life threatening. *Clin Infect Dis.* 2008;46(2):165-  
772 71. Epub 2008/01/04. doi: 10.1086/524888. PubMed PMID: 18171245; PubMed Central PMCID:  
773 PMC2533694.
- 774 11. Cox-Singh J, Hiu J, Lucas SB, Divis PC, Zulkarnaen M, Chandran P, et al. Severe malaria - a case  
775 of fatal *Plasmodium knowlesi* infection with post-mortem findings: a case report. *Malar J.* 2010;9:10.

- 776 Epub 2010/01/13. doi: 10.1186/1475-2875-9-10. PubMed PMID: 20064229; PubMed Central PMCID:  
777 PMCPMC2818646.
- 778 12. Daneshvar C, Davis TM, Cox-Singh J, Rafa'ee MZ, Zakaria SK, Divis PC, et al. Clinical and  
779 laboratory features of human Plasmodium knowlesi infection. Clin Infect Dis. 2009;49(6):852-60. Epub  
780 2009/07/29. doi: 10.1086/605439. PubMed PMID: 19635025; PubMed Central PMCID:  
781 PMCPMC2843824.
- 782 13. Daneshvar C, William T, Davis TME. Clinical features and management of Plasmodium  
783 knowlesi infections in humans. Parasitology. 2018;145(1):18-31. Epub 2017/01/27. doi:  
784 10.1017/S0031182016002638. PubMed PMID: 28122651.
- 785 14. Cox-Singh J. Plasmodium knowlesi: experimental model, zoonotic pathogen and golden  
786 opportunity? Parasitology. 2018;145(1):1-5. Epub 2017/11/17. doi: 10.1017/S0031182017001858.  
787 PubMed PMID: 29144211.
- 788 15. Cox-Singh J, Culleton R. Plasmodium knowlesi: from severe zoonosis to animal model. Trends  
789 Parasitol. 2015;31(6):232-8. Epub 2015/04/04. doi: 10.1016/j.pt.2015.03.003. PubMed PMID:  
790 25837310.
- 791 16. Pain A, Bohme U, Berry AE, Mungall K, Finn RD, Jackson AP, et al. The genome of the simian  
792 and human malaria parasite Plasmodium knowlesi. Nature. 2008;455(7214):799-803. Epub  
793 2008/10/10. doi: 10.1038/nature07306. PubMed PMID: 18843368; PubMed Central PMCID:  
794 PMCPMC2656934.
- 795 17. Pinheiro MM, Ahmed MA, Millar SB, Sanderson T, Otto TD, Lu WC, et al. Plasmodium knowlesi  
796 genome sequences from clinical isolates reveal extensive genomic dimorphism. PLoS One.  
797 2015;10(4):e0121303. Epub 2015/04/02. doi: 10.1371/journal.pone.0121303. PubMed PMID:  
798 25830531; PubMed Central PMCID: PMCPMC4382175.
- 799 18. Harrison TE, Reid AJ, Cunningham D, Langhorne J, Higgins MK. Structure of the Plasmodium-  
800 interspersed repeat proteins of the malaria parasite. Proc Natl Acad Sci U S A. 2020;117(50):32098-  
801 104. Epub 2020/12/02. doi: 10.1073/pnas.2016775117. PubMed PMID: 33257570; PubMed Central  
802 PMCID: PMCPMC7749308.
- 803 19. Wahlgren M, Goel S, Akhouri RR. Variant surface antigens of Plasmodium falciparum and their  
804 roles in severe malaria. Nat Rev Microbiol. 2017;15(8):479-91. Epub 2017/06/13. doi:  
805 10.1038/nrmicro.2017.47. PubMed PMID: 28603279.
- 806 20. Gardner MJ, Hall N, Fung E, White O, Berriman M, Hyman RW, et al. Genome sequence of the  
807 human malaria parasite Plasmodium falciparum. Nature. 2002;419(6906):498-511. Epub 2002/10/09.  
808 doi: 10.1038/nature01097. PubMed PMID: 12368864; PubMed Central PMCID: PMCPMC3836256.

- 809 21. Otto TD, Bohme U, Sanders M, Reid A, Bruske EI, Duffy CW, et al. Long read assemblies of  
810 geographically dispersed *Plasmodium falciparum* isolates reveal highly structured subtelomeres.  
811 Wellcome Open Res. 2018;3:52. Epub 2018/06/05. doi: 10.12688/wellcomeopenres.14571.1.  
812 PubMed PMID: 29862326; PubMed Central PMCID: PMC5964635.
- 813 22. Abdi AI, Hodgson SH, Muthui MK, Kivisi CA, Kamuyu G, Kimani D, et al. *Plasmodium falciparum*  
814 malaria parasite var gene expression is modified by host antibodies: longitudinal evidence from  
815 controlled infections of Kenyan adults with varying natural exposure. BMC Infect Dis. 2017;17(1):585.  
816 Epub 2017/08/25. doi: 10.1186/s12879-017-2686-0. PubMed PMID: 28835215; PubMed Central  
817 PMCID: PMC5569527.
- 818 23. Andrade CM, Fleckenstein H, Thomson-Luque R, Doumbo S, Lima NF, Anderson C, et al.  
819 Increased circulation time of *Plasmodium falciparum* underlies persistent asymptomatic infection in  
820 the dry season. Nat Med. 2020;26(12):1929-40. Epub 2020/10/28. doi: 10.1038/s41591-020-1084-0.  
821 PubMed PMID: 33106664.
- 822 24. Hviid L, Jensen AT. PfEMP1 - A Parasite Protein Family of Key Importance in *Plasmodium*  
823 *falciparum* Malaria Immunity and Pathogenesis. Adv Parasitol. 2015;88:51-84. Epub 2015/04/26. doi:  
824 10.1016/bs.apar.2015.02.004. PubMed PMID: 25911365.
- 825 25. Jensen AR, Adams Y, Hviid L. Cerebral *Plasmodium falciparum* malaria: The role of PfEMP1 in  
826 its pathogenesis and immunity, and PfEMP1-based vaccines to prevent it. Immunol Rev.  
827 2020;293(1):230-52. Epub 2019/09/29. doi: 10.1111/imr.12807. PubMed PMID: 31562653; PubMed  
828 Central PMCID: PMC6972667.
- 829 26. Lavstsen T, Turner L, Saguti F, Magistrado P, Rask TS, Jespersen JS, et al. *Plasmodium*  
830 *falciparum* erythrocyte membrane protein 1 domain cassettes 8 and 13 are associated with severe  
831 malaria in children. Proc Natl Acad Sci U S A. 2012;109(26):E1791-800. Epub 2012/05/24. doi:  
832 10.1073/pnas.1120455109. PubMed PMID: 22619319; PubMed Central PMCID: PMC3387094.
- 833 27. Milner DA, Jr. Malaria Pathogenesis. Cold Spring Harb Perspect Med. 2018;8(1). Epub  
834 2017/05/24. doi: 10.1101/cshperspect.a025569. PubMed PMID: 28533315; PubMed Central PMCID:  
835 PMC5749143.
- 836 28. Shabani E, Hanisch B, Opoka RO, Lavstsen T, John CC. *Plasmodium falciparum* EPCR-binding  
837 PfEMP1 expression increases with malaria disease severity and is elevated in retinopathy negative  
838 cerebral malaria. BMC Med. 2017;15(1):183. Epub 2017/10/14. doi: 10.1186/s12916-017-0945-y.  
839 PubMed PMID: 29025399; PubMed Central PMCID: PMC5639490.
- 840 29. Tessema SK, Nakajima R, Jasinskas A, Monk SL, Lekieffre L, Lin E, et al. Protective Immunity  
841 against Severe Malaria in Children Is Associated with a Limited Repertoire of Antibodies to Conserved

- 842 PfEMP1 Variants. *Cell Host Microbe*. 2019;26(5):579-90 e5. Epub 2019/11/15. doi:  
843 10.1016/j.chom.2019.10.012. PubMed PMID: 31726028.
- 844 30. Lapp SA, Geraldo JA, Chien JT, Ay F, Pakala SB, Batugedara G, et al. PacBio assembly of a  
845 Plasmodium knowlesi genome sequence with Hi-C correction and manual annotation of the SICAvr  
846 gene family. *Parasitology*. 2018;145(1):71-84. Epub 2017/07/20. doi: 10.1017/S0031182017001329.  
847 PubMed PMID: 28720171; PubMed Central PMCID: PMC5798397.
- 848 31. Lapp SA, Mok S, Zhu L, Wu H, Preiser PR, Bozdech Z, et al. Plasmodium knowlesi gene  
849 expression differs in ex vivo compared to in vitro blood-stage cultures. *Malar J*. 2015;14:110. Epub  
850 2015/04/17. doi: 10.1186/s12936-015-0612-8. PubMed PMID: 25880967; PubMed Central PMCID:  
851 PMC4369371.
- 852 32. Corredor V, Meyer EVS, Lapp S, Corredor-Medina C, Huber CS, Evans AG, et al. A SICAvr  
853 switching event in Plasmodium knowlesi is associated with the DNA rearrangement of conserved 3'  
854 non-coding sequences. *Molecular and Biochemical Parasitology*. 2004;138(1):37-49. doi:  
855 10.1016/j.molbiopara.2004.05.017.
- 856 33. Heather JM, Chain B. The sequence of sequencers: The history of sequencing DNA. *Genomics*.  
857 2016;107(1):1-8. Epub 2015/11/12. doi: 10.1016/j.ygeno.2015.11.003. PubMed PMID: 26554401;  
858 PubMed Central PMCID: PMC4727787.
- 859 34. Benavente ED, de Sessions PF, Moon RW, Grainger M, Holder AA, Blackman MJ, et al. A  
860 reference genome and methylome for the Plasmodium knowlesi A1-H.1 line. *Int J Parasitol*. 2018;48(3-  
861 4):191-6. Epub 2017/12/21. doi: 10.1016/j.ijpara.2017.09.008. PubMed PMID: 29258833.
- 862 35. Ahmed AM, Pinheiro MM, Divis PC, Siner A, Zainudin R, Wong IT, et al. Disease progression in  
863 Plasmodium knowlesi malaria is linked to variation in invasion gene family members. *PLoS Negl Trop*  
864 *Dis*. 2014;8(8):e3086. Epub 2014/08/15. doi: 10.1371/journal.pntd.0003086. PubMed PMID:  
865 25121807; PubMed Central PMCID: PMC4133233.
- 866 36. Ahmed MA, Quan FS. Plasmodium knowlesi clinical isolates from Malaysia show extensive  
867 diversity and strong differential selection pressure at the merozoite surface protein 7D (MSP7D).  
868 *Malar J*. 2019;18(1):150. Epub 2019/05/01. doi: 10.1186/s12936-019-2782-2. PubMed PMID:  
869 31035999; PubMed Central PMCID: PMC6489361.
- 870 37. Assefa S, Lim C, Preston MD, Duffy CW, Nair MB, Adroub SA, et al. Population genomic  
871 structure and adaptation in the zoonotic malaria parasite Plasmodium knowlesi. *Proc Natl Acad Sci U*  
872 *S A*. 2015;112(42):13027-32. Epub 2015/10/07. doi: 10.1073/pnas.1509534112. PubMed PMID:  
873 26438871; PubMed Central PMCID: PMC4620865.
- 874 38. Divis PCS, Duffy CW, Kadir KA, Singh B, Conway DJ. Genome-wide mosaicism in divergence  
875 between zoonotic malaria parasite subpopulations with separate sympatric transmission cycles. *Mol*

- 876 Ecol. 2018;27(4):860-70. Epub 2018/01/03. doi: 10.1111/mec.14477. PubMed PMID: 29292549;  
877 PubMed Central PMCID: PMC5918592.
- 878 39. Fong MY, Lau YL, Jelip J, Ooi CH, Cheong FW. Genetic characterisation of the erythrocyte-  
879 binding protein (Pkbetal) of Plasmodium knowlesi isolates from Malaysia. J Genet. 2019;98. Epub  
880 2019/09/24. PubMed PMID: 31544794.
- 881 40. Gel B, Serra E. karyoploteR: an R/Bioconductor package to plot customizable genomes  
882 displaying arbitrary data. Bioinformatics. 2017;33(19):3088-90. doi: 10.1093/bioinformatics/btx346.
- 883 41. Nattestad M, Schatz MC. Assemblytics: a web analytics tool for the detection of variants from  
884 an assembly. Bioinformatics. 2016;32(19):3021-3. doi: 10.1093/bioinformatics/btw369.
- 885 42. Wang Y, Tang H, Debarry JD, Tan X, Li J, Wang X, et al. MCSScanX: a toolkit for detection and  
886 evolutionary analysis of gene synteny and collinearity. Nucleic Acids Res. 2012;40(7):e49. Epub  
887 2012/01/06. doi: 10.1093/nar/gkr1293. PubMed PMID: 22217600; PubMed Central PMCID:  
888 PMC3326336.
- 889 43. Thorpe P, Escudero-Martinez CM, Cock PJA, Eves-van den Akker S, Bos JIB. Shared  
890 Transcriptional Control and Disparate Gain and Loss of Aphid Parasitism Genes. Genome Biol Evol.  
891 2018;10(10):2716-33. Epub 2018/08/31. doi: 10.1093/gbe/evy183. PubMed PMID: 30165560;  
892 PubMed Central PMCID: PMC6186164.
- 893 44. Gil M, Zanetti MS, Zoller S, Anisimova M. CodonPhyML: fast maximum likelihood phylogeny  
894 estimation under codon substitution models. Mol Biol Evol. 2013;30(6):1270-80. Epub 2013/02/26.  
895 doi: 10.1093/molbev/mst034. PubMed PMID: 23436912; PubMed Central PMCID: PMC3649670.
- 896 45. Oresegun DR, Daneshvar C, Cox-Singh J. Plasmodium knowlesi – Clinical Isolate Genome  
897 Sequencing to Inform Translational Same-Species Model System for Severe Malaria. Frontiers in  
898 Cellular and Infection Microbiology. 2021;11(90). doi: 10.3389/fcimb.2021.607686.
- 899 46. Moon RW, Hall J, Rangkuti F, Ho YS, Almond N, Mitchell GH, et al. Adaptation of the genetically  
900 tractable malaria pathogen Plasmodium knowlesi to continuous culture in human erythrocytes. Proc  
901 Natl Acad Sci U S A. 2013;110(2):531-6. Epub 2012/12/26. doi: 10.1073/pnas.1216457110. PubMed  
902 PMID: 23267069; PubMed Central PMCID: PMC3545754.
- 903 47. Oxford Nanopore T. Medaka: consensus sequence tool for nanopore sequences. 0.6.5 ed:  
904 Oxford Nanopore Technologies; 2019.
- 905 48. Steinbiss S, Silva-Franco F, Brunk B, Foth B, Hertz-Fowler C, Berriman M, et al. Companion: a  
906 web server for annotation and analysis of parasite genomes. Nucleic Acids Res. 2016;44(Web Server  
907 issue):W29-W34. doi: 10.1093/nar/gkw292.
- 908 49. Vaser R, Sović I, Nagarajan N, Šikić M. Fast and accurate de novo genome assembly from long  
909 uncorrected reads. Genome Res. 2017;27(5):737-46. doi: 10.1101/gr.214270.116.

- 910 50. Walker BJ, Abeel T, Shea T, Priest M, Abouelliel A, Sakthikumar S, et al. Pilon: An Integrated  
911 Tool for Comprehensive Microbial Variant Detection and Genome Assembly Improvement. *PLoS ONE*.  
912 2014;9(11):e112963. doi: 10.1371/journal.pone.0112963.
- 913 51. Jain M, Koren S, Miga KH, Quick J, Rand AC, Sasani TA, et al. Nanopore sequencing and  
914 assembly of a human genome with ultra-long reads. *Nat Biotechnol*. 2018;36(4):338-45. Epub  
915 2018/02/13. doi: 10.1038/nbt.4060. PubMed PMID: 29431738; PubMed Central PMCID:  
916 PMC5889714.
- 917 52. Laver T, Harrison J, O'Neill PA, Moore K, Farbos A, Paszkiewicz K, et al. Assessing the  
918 performance of the Oxford Nanopore Technologies MinION. *Biomol Detect Quantif*. 2015;3:1-8. Epub  
919 2016/01/12. doi: 10.1016/j.bdq.2015.02.001. PubMed PMID: 26753127; PubMed Central PMCID:  
920 PMC4691839.
- 921 53. Shafin K, Pesout T, Lorig-Roach R, Haukness M, Olsen HE, Bosworth C, et al. Nanopore  
922 sequencing and the Shasta toolkit enable efficient de novo assembly of eleven human genomes. *Nat*  
923 *Biotechnol*. 2020;38(9):1044-53. Epub 2020/07/21. doi: 10.1038/s41587-020-0503-6. PubMed PMID:  
924 32686750; PubMed Central PMCID: PMC7483855.
- 925 54. Liu C, Yang X, Duffy BF, Hoisington-Lopez J, Crosby M, Porche-Sorbet R, et al. High-resolution  
926 HLA typing by long reads from the R10.3 Oxford nanopore flow cells. *Hum Immunol*. 2021;82(4):288-  
927 95. Epub 2021/02/23. doi: 10.1016/j.humimm.2021.02.005. PubMed PMID: 33612390.
- 928 55. Wright C. Rebasecalling of SRE and ULK GM24385 Dataset [Data Release]. EPI2ME Labs:  
929 Oxford Nanopore Technologies; 2021 [updated 18/05/2021; cited 2021 27/05/2021]. Available from:  
930 [www.labs.epi2me.io/gm24385\\_2021.05/](http://www.labs.epi2me.io/gm24385_2021.05/).
- 931 56. Divis PCS, Hu TH, Kadir KA, Mohammad DSA, Hii KC, Daneshvar C, et al. Efficient Surveillance  
932 of *Plasmodium knowlesi* Genetic Subpopulations, Malaysian Borneo, 2000-2018. *Emerg Infect Dis*.  
933 2020;26(7):1392-8. Epub 2020/06/23. doi: 10.3201/eid2607.190924. PubMed PMID: 32568035;  
934 PubMed Central PMCID: PMC7323547.
- 935 57. Diez Benavente E, Florez de Sessions P, Moon RW, Holder AA, Blackman MJ, Roper C, et al.  
936 Analysis of nuclear and organellar genomes of *Plasmodium knowlesi* in humans reveals ancient  
937 population structure and recent recombination among host-specific subpopulations. *PLOS Genetics*.  
938 2017;13(9):e1007008. doi: 10.1371/journal.pgen.1007008.
- 939 58. Benavente ED, Gomes AR, De Silva JR, Grigg M, Walker H, Barber BE, et al. Whole genome  
940 sequencing of amplified *Plasmodium knowlesi* DNA from unprocessed blood reveals genetic exchange  
941 events between Malaysian Peninsular and Borneo subpopulations. *Sci Rep*. 2019;9(1):9873. Epub  
942 2019/07/10. doi: 10.1038/s41598-019-46398-z. PubMed PMID: 31285495; PubMed Central PMCID:  
943 PMC6614422.

- 944 59. International Human Genome Sequencing C, Lander ES, Linton LM, Birren B, Nusbaum C, Zody  
945 MC, et al. Initial sequencing and analysis of the human genome. *Nature*. 2001;409(6822):860-921. doi:  
946 10.1038/35057062.
- 947 60. Li H. Minimap2: pairwise alignment for nucleotide sequences. *Bioinformatics*.  
948 2018;34(18):3094-100. doi: 10.1093/bioinformatics/bty191.
- 949 61. Li H. A statistical framework for SNP calling, mutation discovery, association mapping and  
950 population genetical parameter estimation from sequencing data. *Bioinformatics (Oxford, England)*.  
951 2011;27(21):2987-93. doi: 10.1093/bioinformatics/btr509.
- 952 62. Li H, Handsaker B, Wysoker A, Fennell T, Ruan J, Homer N, et al. The Sequence Alignment/Map  
953 format and SAMtools. *Bioinformatics*. 2009;25(16):2078-9. doi: 10.1093/bioinformatics/btp352.
- 954 63. Quinlan AR, Hall IM. BEDTools: a flexible suite of utilities for comparing genomic features.  
955 *Bioinformatics*. 2010;26(6):841-2. doi: 10.1093/bioinformatics/btq033.
- 956 64. Kolmogorov M. Fast and accurate de novo assembler for single molecule sequencing reads:  
957 fenderglass/Flye. 2019.
- 958 65. Laetsch DR, Blaxter ML. BlobTools: Interrogation of genome assemblies. *F1000Research*.  
959 2017;6:1287. doi: 10.12688/f1000research.12232.1.
- 960 66. Morgulis A, Coulouris G, Raytselis Y, Madden TL, Agarwala R, Schäffer AA. Database indexing  
961 for production MegaBLAST searches. *Bioinformatics*. 2008;24(16):1757-64. doi:  
962 10.1093/bioinformatics/btn322.
- 963 67. Hunt M, Silva ND, Otto TD, Parkhill J, Keane JA, Harris SR. Circlator: automated circularization  
964 of genome assemblies using long sequencing reads. *Genome Biol*. 2015;16:294. doi: 10.1186/s13059-  
965 015-0849-0.
- 966 68. Flynn JM, Hubley R, Goubert C, Rosen J, Clark AG, Feschotte C, et al. RepeatModeler2 for  
967 automated genomic discovery of transposable element families. *Proc Natl Acad Sci U S A*.  
968 2020;117(17):9451-7. Epub 2020/04/18. doi: 10.1073/pnas.1921046117. PubMed PMID: 32300014;  
969 PubMed Central PMCID: PMC7196820.
- 970 69. Kohany O, Gentles AJ, Hankus L, Jurka J. Annotation, submission and screening of repetitive  
971 elements in Repbase: RepbaseSubmitter and Censor. *BMC Bioinformatics*. 2006;7(1):474. doi:  
972 10.1186/1471-2105-7-474.
- 973 70. Fu L, Niu B, Zhu Z, Wu S, Li W. CD-HIT: accelerated for clustering the next-generation  
974 sequencing data. *Bioinformatics (Oxford, England)*. 2012;28(23):3150-2. doi:  
975 10.1093/bioinformatics/bts565.



- 976 71. Li W, Godzik A. Cd-hit: a fast program for clustering and comparing large sets of protein or  
977 nucleotide sequences. *Bioinformatics* (Oxford, England). 2006;22(13):1658-9. doi:  
978 10.1093/bioinformatics/btl158.
- 979 72. Bailly-Bechet M, Haudry A, Lerat E. "One code to find them all": a perl tool to conveniently  
980 parse RepeatMasker output files. *Mobile DNA*. 2014;5(1):13. doi: 10.1186/1759-8753-5-13.
- 981 73. Ellinghaus D, Kurtz S, Willhoeft U. LTRharvest, an efficient and flexible software for de novo  
982 detection of LTR retrotransposons. *BMC Bioinformatics*. 2008;9:18. doi: 10.1186/1471-2105-9-18.
- 983 74. Gremme G, Steinbiss S, Kurtz S. GenomeTools: a comprehensive software library for efficient  
984 processing of structured genome annotations. *IEEE/ACM Trans Comput Biol Bioinform*.  
985 2013;10(3):645-56. Epub 2013/10/05. doi: 10.1109/TCBB.2013.68. PubMed PMID: 24091398.
- 986 75. Alonge M, Soyk S, Ramakrishnan S, Wang X, Goodwin S, Sedlazeck FJ, et al. RaGOO: fast and  
987 accurate reference-guided scaffolding of draft genomes. *Genome Biol*. 2019;20(1):224. Epub  
988 2019/10/30. doi: 10.1186/s13059-019-1829-6. PubMed PMID: 31661016; PubMed Central PMCID:  
989 PMC6816165.
- 990 76. Stanke M, Keller O, Gunduz I, Hayes A, Waack S, Morgenstern B. AUGUSTUS: ab initio  
991 prediction of alternative transcripts. *Nucleic Acids Res*. 2006;34(Web Server issue):W435-W9. doi:  
992 10.1093/nar/gkl200.
- 993 77. Simão FA, Waterhouse RM, Ioannidis P, Kriventseva EV, Zdobnov EM. BUSCO: assessing  
994 genome assembly and annotation completeness with single-copy orthologs. *Bioinformatics*.  
995 2015;31(19):3210-2. doi: 10.1093/bioinformatics/btv351.
- 996 78. Okonechnikov K, Conesa A, García-Alcalde F. Qualimap 2: advanced multi-sample quality  
997 control for high-throughput sequencing data. *Bioinformatics*. 2016;32(2):292-4. doi:  
998 10.1093/bioinformatics/btv566.
- 999 79. Cabanettes F, Klopp C. D-GENIES: dot plot large genomes in an interactive, efficient and simple  
1000 way. *PeerJ*. 2018;6:e4958. Epub 2018/06/12. doi: 10.7717/peerj.4958. PubMed PMID: 29888139;  
1001 PubMed Central PMCID: PMC5991294.
- 1002 80. Ren J, Chaisson MJP. Ira: the Long Read Aligner for Sequences and Contigs. preprint.  
1003 *Bioinformatics*, 2020 2020/11/17/. Report No.
- 1004 81. Pedersen BS, Quinlan AR. Mosdepth: quick coverage calculation for genomes and exomes.  
1005 *Bioinformatics*. 2018;34(5):867-8. doi: 10.1093/bioinformatics/btx699.
- 1006 82. Jiang T, Liu Y, Jiang Y, Li J, Gao Y, Cui Z, et al. Long-read-based human genomic structural  
1007 variation detection with cuteSV. *Genome Biol*. 2020;21(1):189. doi: 10.1186/s13059-020-02107-y.

- 1008 83. Jeffares DC, Jolly C, Hoti M, Speed D, Shaw L, Rallis C, et al. Transient structural variations have  
1009 strong effects on quantitative traits and reproductive isolation in fission yeast. *Nature*  
1010 *Communications*. 2017;8(1):14061. doi: 10.1038/ncomms14061.
- 1011 84. Thorvaldsdóttir H, Robinson JT, Mesirov JP. Integrative Genomics Viewer (IGV): high-  
1012 performance genomics data visualization and exploration. *Briefings in Bioinformatics*. 2013;14(2):178-  
1013 92. doi: 10.1093/bib/bbs017.
- 1014 85. Emms DM, Kelly S. OrthoFinder: phylogenetic orthology inference for comparative genomics.  
1015 *Genome Biol*. 2019;20(1):238. Epub 2019/11/16. doi: 10.1186/s13059-019-1832-y. PubMed PMID:  
1016 31727128; PubMed Central PMCID: PMC6857279.
- 1017 86. Edgar RC. MUSCLE: multiple sequence alignment with high accuracy and high throughput.  
1018 *Nucleic Acids Res*. 2004;32(5):1792-7. Epub 2004/03/23. doi: 10.1093/nar/gkh340. PubMed PMID:  
1019 15034147; PubMed Central PMCID: PMC6857279.
- 1020 87. Cock PJ, Antao T, Chang JT, Chapman BA, Cox CJ, Dalke A, et al. Biopython: freely available  
1021 Python tools for computational molecular biology and bioinformatics. *Bioinformatics*.  
1022 2009;25(11):1422-3. Epub 2009/03/24. doi: 10.1093/bioinformatics/btp163. PubMed PMID:  
1023 19304878; PubMed Central PMCID: PMC6857279.
- 1024 88. Capella-Gutierrez S, Silla-Martinez JM, Gabaldon T. trimAl: a tool for automated alignment  
1025 trimming in large-scale phylogenetic analyses. *Bioinformatics*. 2009;25(15):1972-3. Epub 2009/06/10.  
1026 doi: 10.1093/bioinformatics/btp348. PubMed PMID: 19505945; PubMed Central PMCID:  
1027 PMC6857279.
- 1028 89. Eves-van den Akker S, Laetsch DR, Thorpe P, Lilley CJ, Danchin EG, Da Rocha M, et al. The  
1029 genome of the yellow potato cyst nematode, *Globodera rostochiensis*, reveals insights into the basis  
1030 of parasitism and virulence. *Genome Biol*. 2016;17(1):124. Epub 2016/06/12. doi: 10.1186/s13059-  
1031 016-0985-1. PubMed PMID: 27286965; PubMed Central PMCID: PMC6857279.
- 1032 90. Thorpe P, Escudero-Martinez CM, Eves-van den Akker S, Bos JIB. Transcriptional changes in  
1033 the aphid species *Myzus cerasi* under different host and environmental conditions. *Insect Mol Biol*.  
1034 2020;29(3):271-82. Epub 2019/12/18. doi: 10.1111/imb.12631. PubMed PMID: 31846128; PubMed  
1035 Central PMCID: PMC6857279.

1036

### 1037 **Supplementary Information (SI)**

#### 1038 **SI File**

1039 Full assembly statistic metrics for the PKNH reference sequence with the apicoplast and  
1040 mitochondrial sequences included (and excluded: PKNH\_noAPI/MIT), Cultured PkA1H1 isolate  
1041 (StAPkA1H1), sks047 and sks048. The file contains metrics amalgamated from the outputs of

1042 Companion, AGAT, QUAST, BUSCO and Assembly-stats. In addition, specific features of the genomes  
1043 have been separated into sub-pages, such as tRNAs and rRNAs.

1044

#### 1045 **SI Figures**

1046 **SI Fig 1.** Whole genome coverage across chromosomes of the StAPkA1H1, sks047 and sks048 draft  
1047 genomes against the PKNH reference genome [16]. Coverage and plots generated using Qualimap  
1048 are shown. The red trace shows troughs that indicate regions of low coverage. Coverage appears  
1049 more stable in StAPkA1H1 (i) than in the clinical isolates sks047 (ii) and sks048 (iii) indicating higher  
1050 variability in the contemporary *P. knowlesi* genomes than in the experimental line when compared  
1051 with the reference.

1052 **SI Fig 2.** Alignments of chromosome 00 (bin) for StAPkA1H1, sks047 and sks048 against the whole  
1053 PKNH genome [16]. Minimap2 alignments of the bin chromosomes against the entire PKNH  
1054 reference genome with a 1kbp alignment length filter. The ‘bin’ chromosomes contain sequence  
1055 fragments that could not be confidently resolved into a particular chromosome during the  
1056 scaffolding process. StAPkA1H1(i) shows a concentration of sequences aligned to the PKNH ‘bin’  
1057 chromosome 00 (green box), while no clustering is evident in sks047(ii) and sks048 (iii).

1058 **SI Fig 3.** Whole-genome alignment of StAPkA1H1, sks047 and sks048 against the *P. knowlesi* PKNH  
1059 reference genome [16]. Dotplots to identify repetitions, breaks and inversions were generated from  
1060 minimap2 whole draft genome alignments for StAPkA1H1(i), sks047 (ii) and sks048 (iii) using D-  
1061 GENIES default settings [79].

1062 The PKNH chromosomes 00 – 14 are shown on the x-axes at the top and size given on the bottom in  
1063 MB. Draft genome chromosomes 00 – 14 are shown on the right y-axes and size in MB on the left.  
1064 The line indicates gene synteny between each draft and the PKNH reference genome. Red boxes  
1065 show where the draft ‘00’ chromosomes align with PKNH chromosome ‘00’.

1066 **SI Fig 4.** Dot plots showing draft genomes aligned against the PKNH reference genome [16] with  
1067 minimum alignment 10kB. SI Fig 4A Chromosome 5 is given for StAPkA1H1 (i), sks047 (ii) and sks048  
1068 (iii), as an example where frameshifts are outlined in purple, gaps outlined in orange, inversions  
1069 outlined in green and inverted repeats in red. Duplications are not shown. SI Fig 4B Shows dot plots  
1070 of alignments of all chromosomes for StAPkA1H1 (i), sks047 (ii) and sks048 (iii) plotted against the  
1071 PKNH reference genome [16] with minimum alignment 10kB. Gaps, frameshifts and large structural  
1072 variants are dispersed across the draft genomes are shown.

1073 **SI Fig 5.** Mauve plot of chromosome 08 for StAPkA1H1, sks047, sks048 and the PKNH [16] reference  
1074 genome. Chromosome 8 of the PKNH reference shows more fragmentation than other  
1075 chromosomes in the genome which may have influenced the chromosome structure inferred for the

1076 draft genomes generated here. Extensive mosaicism has been described in *P. knowlesi* chromosome  
1077 8 due to an overrepresentation of genes expressed in the mosquito stage of the parasite's life cycle  
1078 [57]. Regions of low coverage are still apparent in the draft genomes compared with the PKNH  
1079 reference genome (red boxes).

1080 **SI Fig 6.** Positioning of non-*SICAvar* multigene family members are shown for the PKNH reference  
1081 genome and the three draft genomes using karyoploteR [40].

1082 **SI Fig 6A** *P. knowlesi* PKNH(Pain et al 2008);

1083 **SI Fig 6B** StAPkA1H1 experimental line;

1084 **SI Fig 6C** clinical isolate sks047;

1085 **SI Fig 6D** clinical isolate sks048.

1086 Genes are shown as black squares marked along the chromosome linear map. Genes on the positive  
1087 strand appear above the map line and those on the negative strand below. Identified members of  
1088 select multigene families are given and colour coded based on being on the positive or negative  
1089 strand e.g *TrpRA* on the positive strand is slate blue and coral on the negative strand. The *SICAvar*  
1090 gene family members are presented separately in **SI Fig 7**.

1091 **SI Fig 7.** Positioning of *SICAvar* multigene family members are shown for the PKNH reference  
1092 genome and the three draft genomes using karyoploteR [40].

1093 **SI Fig 7A** *P. knowlesi* PKNH(Pain et al 2008);

1094 **SI Fig 7B** StAPkA1H1 experimental line;

1095 **SI Fig 7C** clinical isolate sks047;

1096 **SI Fig 7D** clinical isolate sks048.

1097 Annotated genes are shown as black squares marked along the chromosome linear map.

1098 Genes on the positive strand appear above the map line and those on the negative strand below.

1099 *SICAvar* genes and gene fragments on the positive strand are in red font and on the negative strand  
1100 in green font.

1101

1102 **SI Fig 8.** Box plot to represent dN/dS ratios for gene-clusters from each gene type: *BUSCO*; *KIR*;  
1103 *SICAvar type 1* and *SICAvar type 2* in the combined dataset from draft genomes StAPkA1H1, sks047,  
1104 sks048 and the PKNH reference [16]. There were 154 *BUSCO*, 27 *KIR*, 15 *SICAvar type 1* and 5  
1105 *SICAvar type 2* gene clusters with mean number of genes 5, 8.59, 32.2 and 18.2 per cluster  
1106 respectively. Clusters containing *SICAvar type 1*, or *SICAvar type 2* or *KIR* genes had a statistically  
1107 significant greater mean dN/dS value when compared to *BUSCO* gene clusters (Wilcoxon rank sum  
1108 test p-value adjustment method Bonferroni: *SICAvar type 1*, = 4.1e-08; *SICAvar type 2* = 0.0063 and  
1109 *KIR*,  $p = 6.7e-13$ ) suggesting these gene family members are under selection pressure.

1110

1111 **SI Tables**

1112 **SI Table 1.** Length of non-nuclear DNA content present in the *P. knowlesi* PKNH [16] and PkA1H1 [34]  
1113 reference in comparison to the three generated draft genomes.

1114 **SI Table 2.** Comparisons of variant call format (VCF) files of sks047 and sks048 against StAPkA1H1  
1115 draft genome.

1116 Legend to supplementary Table 2. Legend to Supplementary Table 2: Comparisons were achieved  
1117 after analysis using the intersect (isec) function of bedtools. Assembly-based SV calling approach  
1118 utilised Assemblytics [41] to call variants between the isolate draft genomes sks047, sks048 and the  
1119 StAPkA1H1 draft genome. Reads-based SV calling approach used input reads of the isolate draft  
1120 genomes against the StAPkA1H1draft genome to call variants with the Oxford Nanopore Structural  
1121 Variation pipeline.

1122

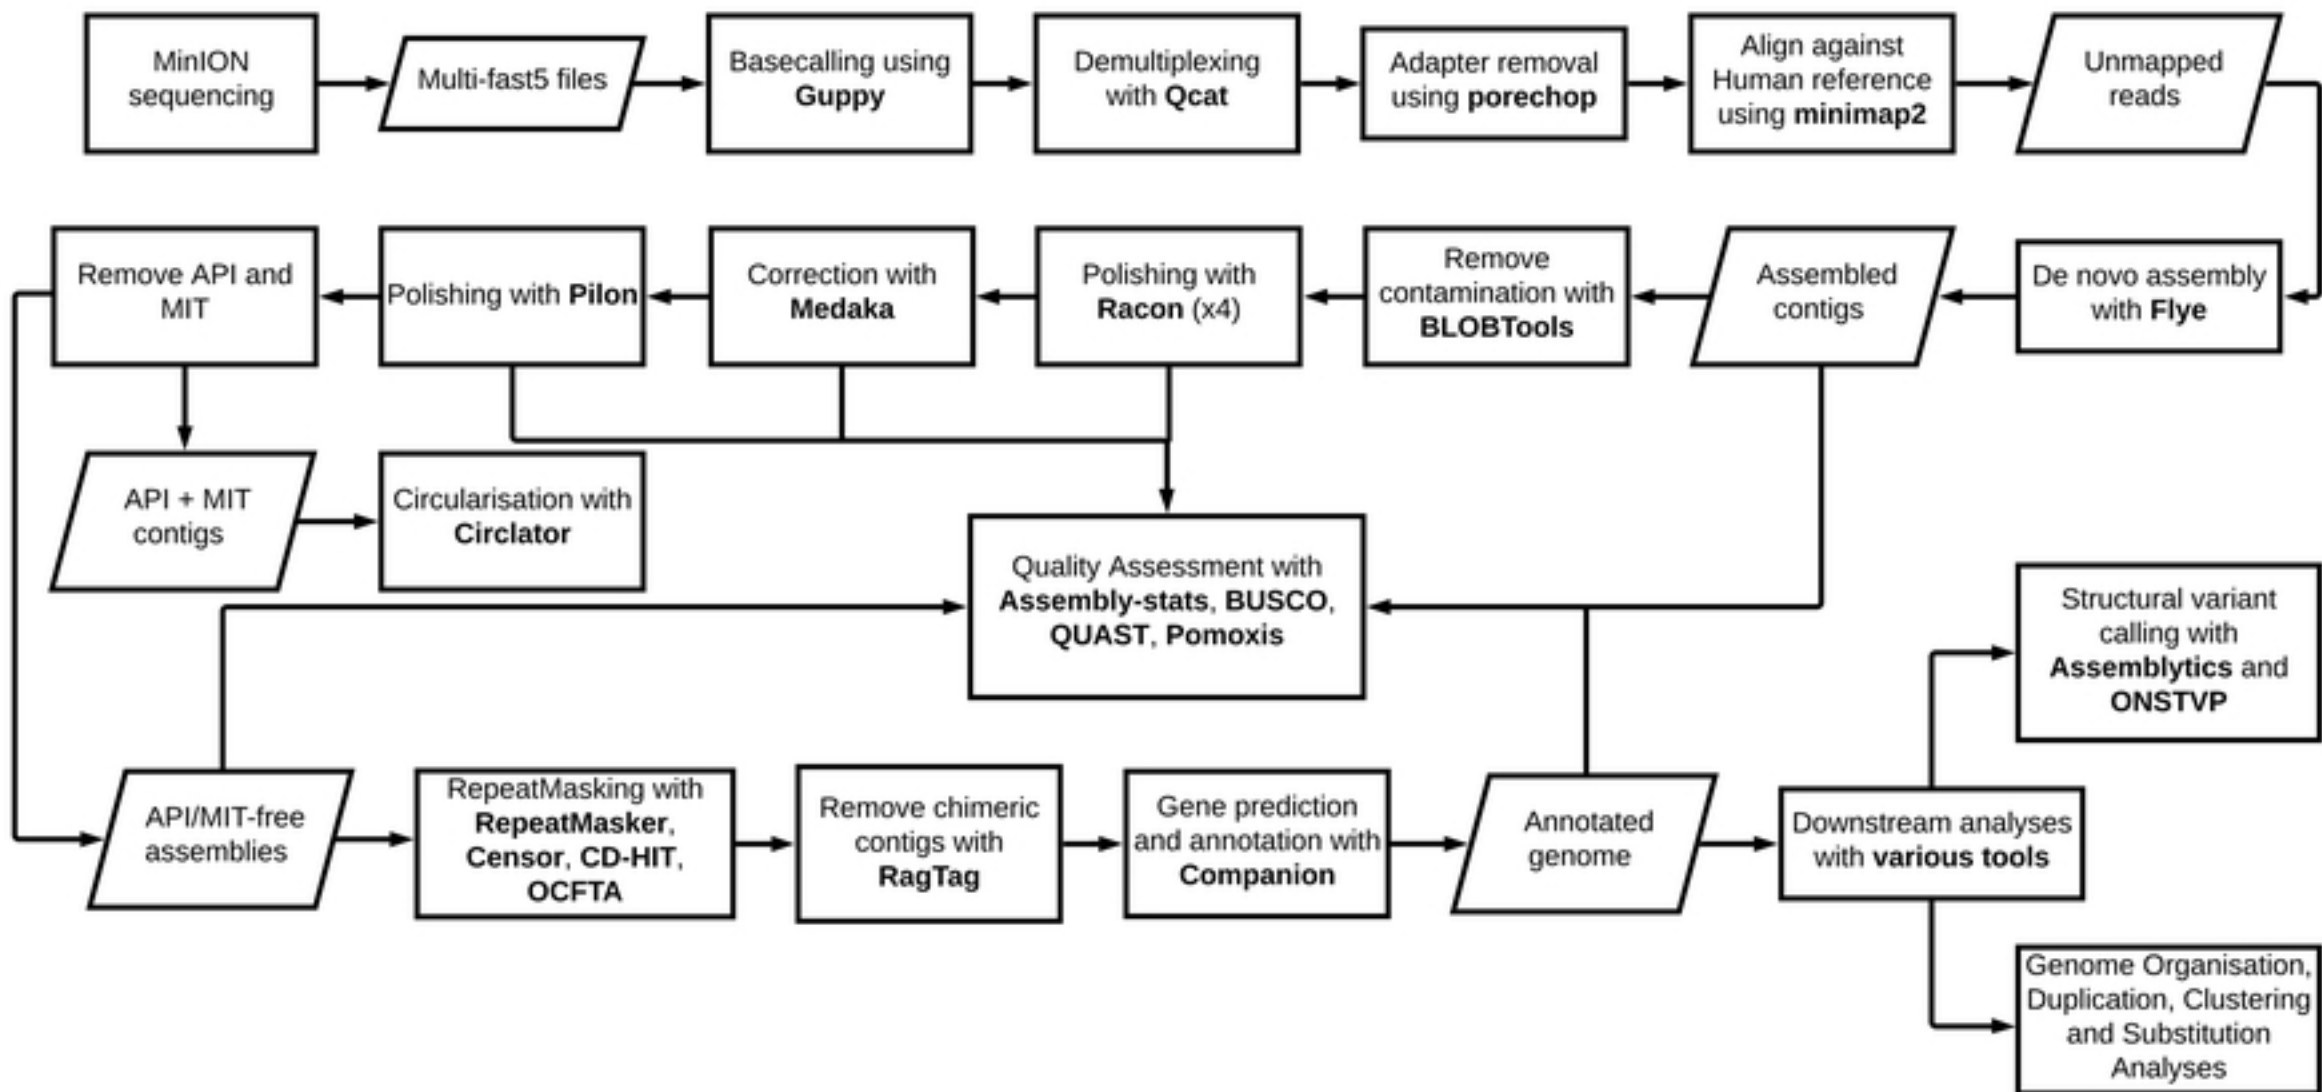

Figure 1

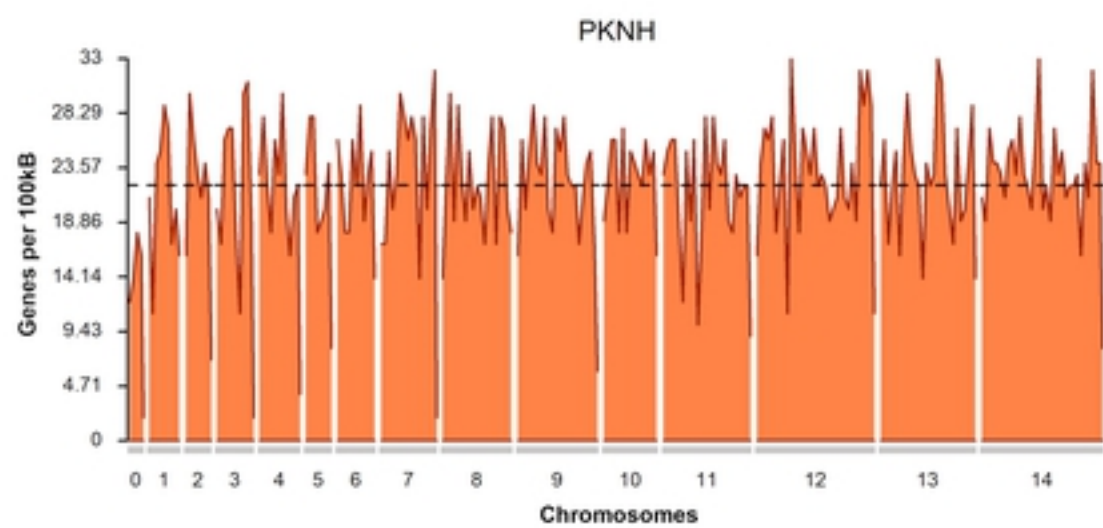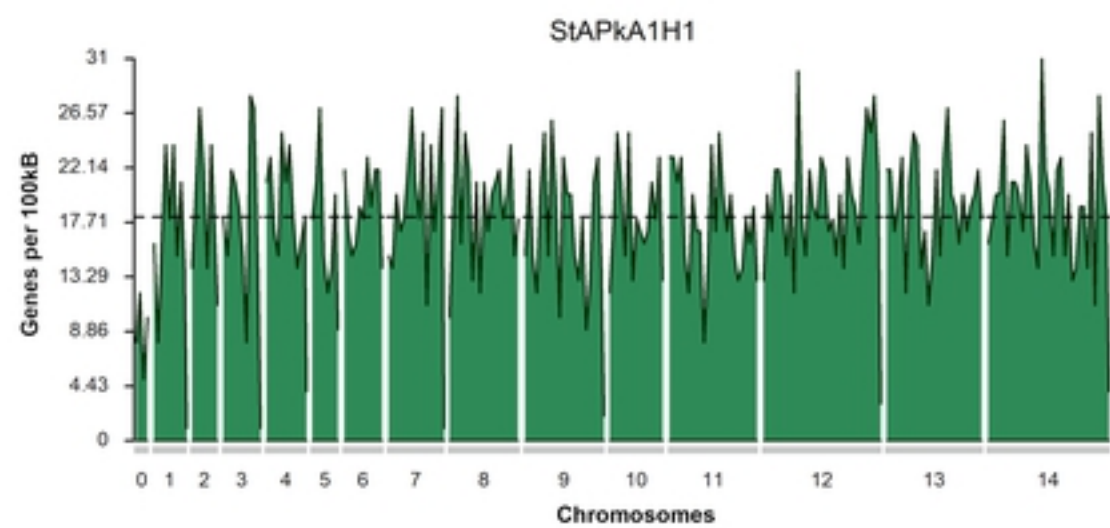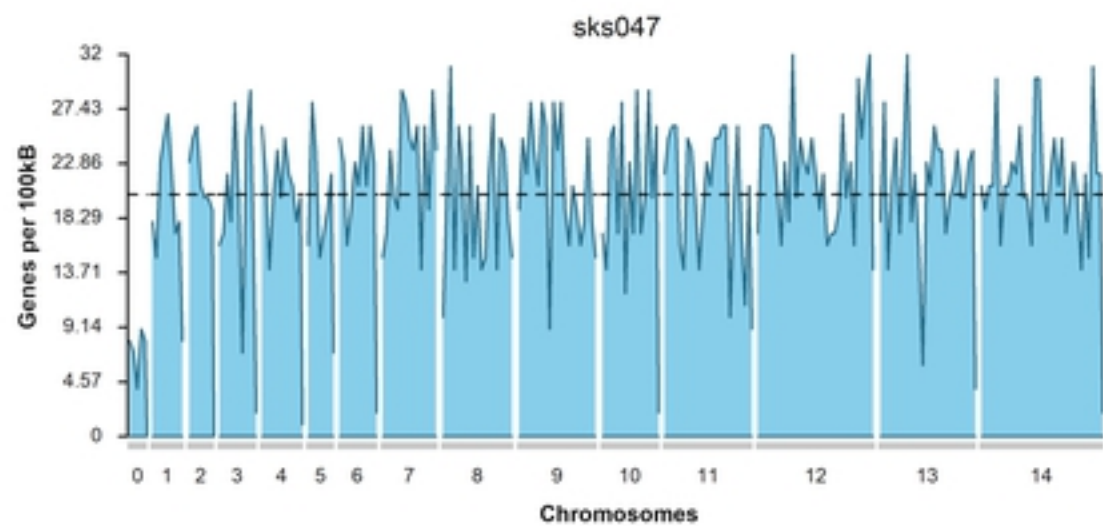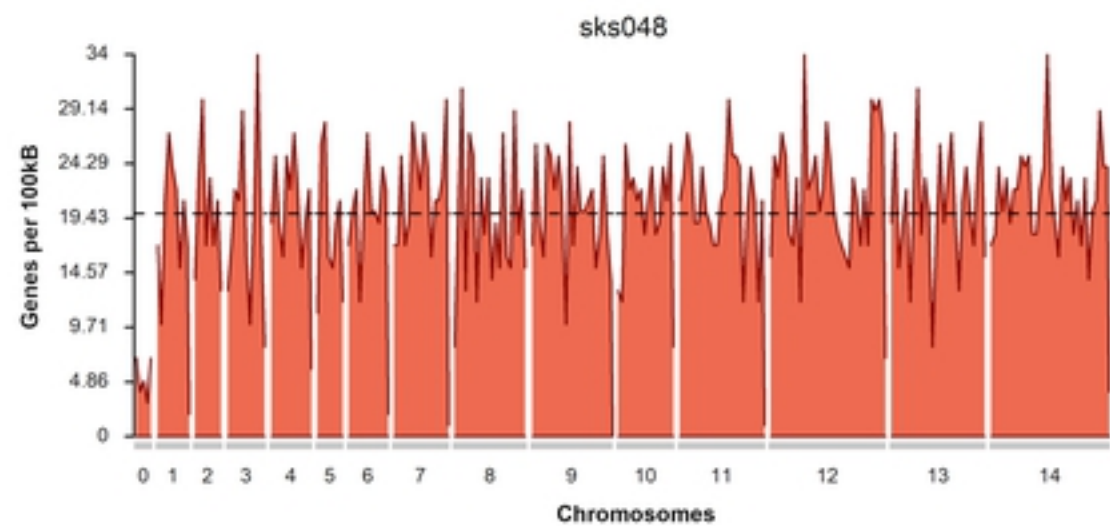

Figure 2

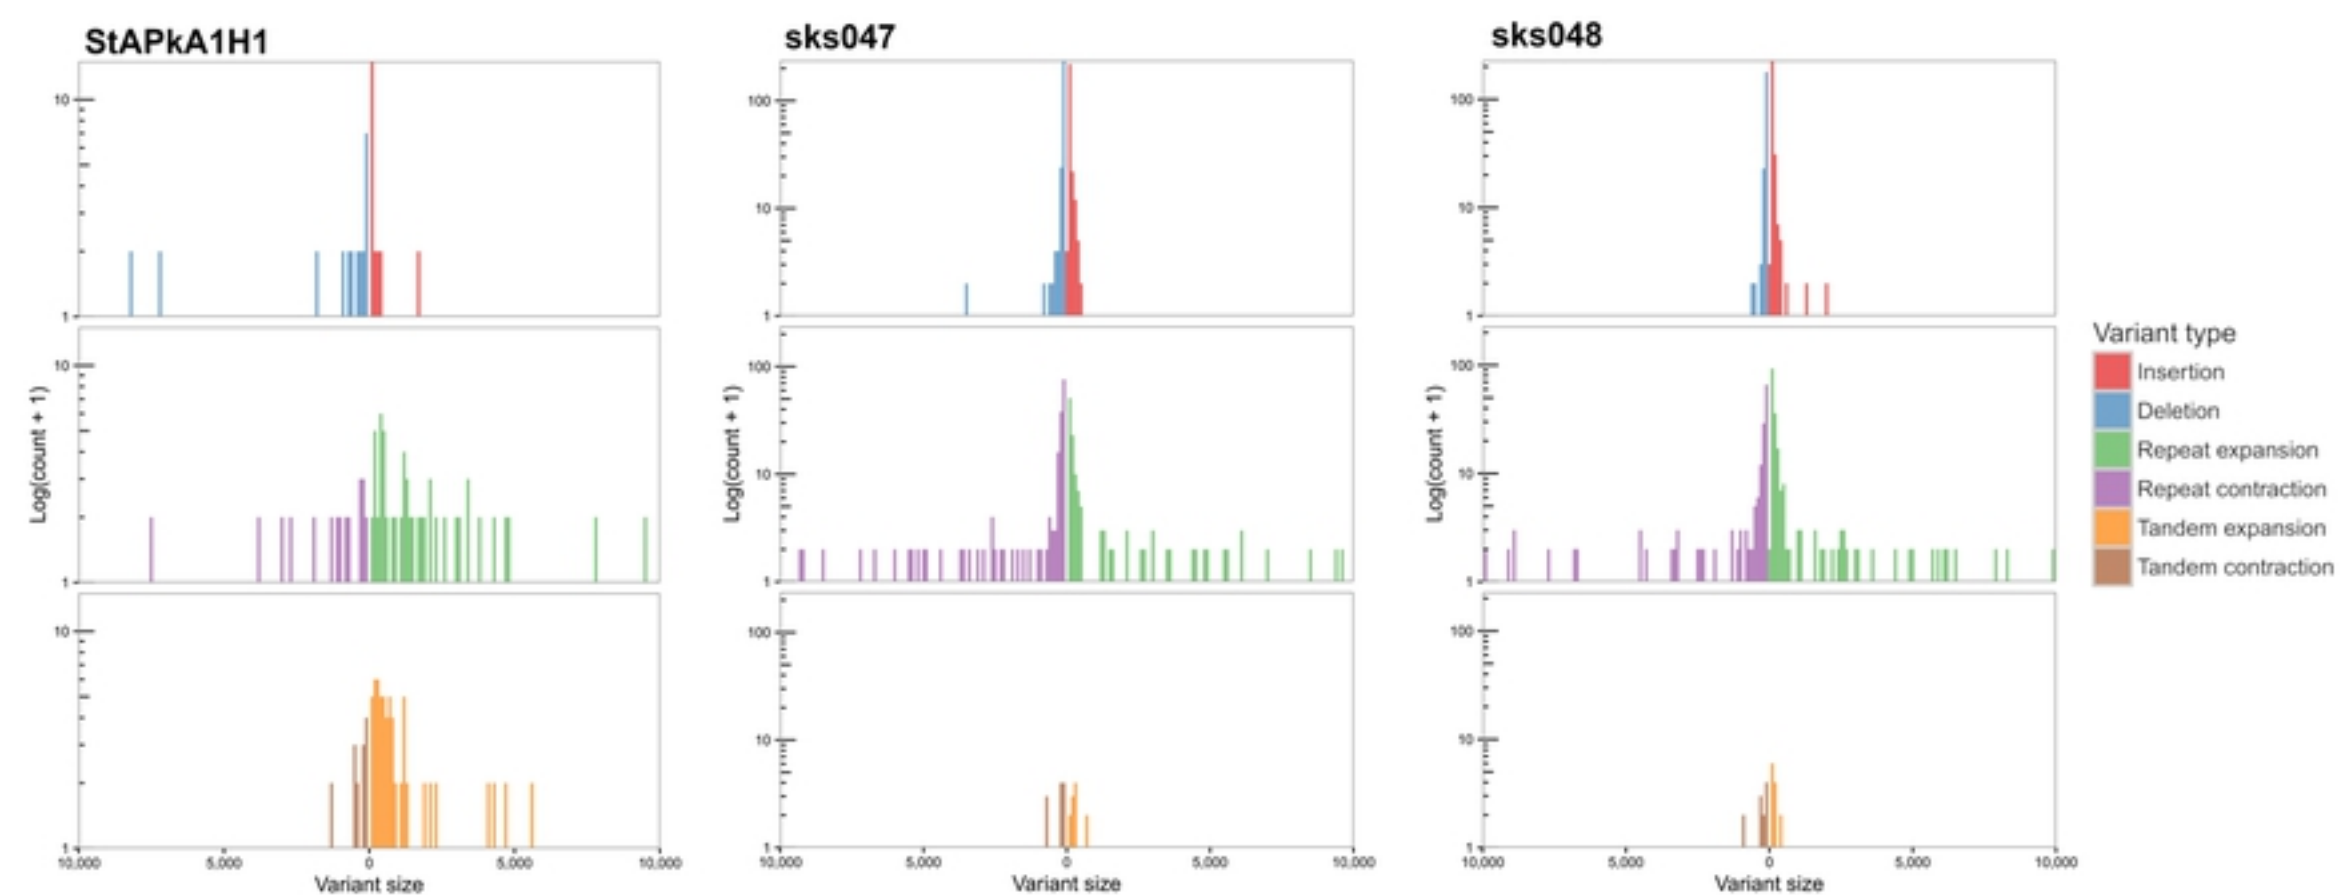

Figure 3



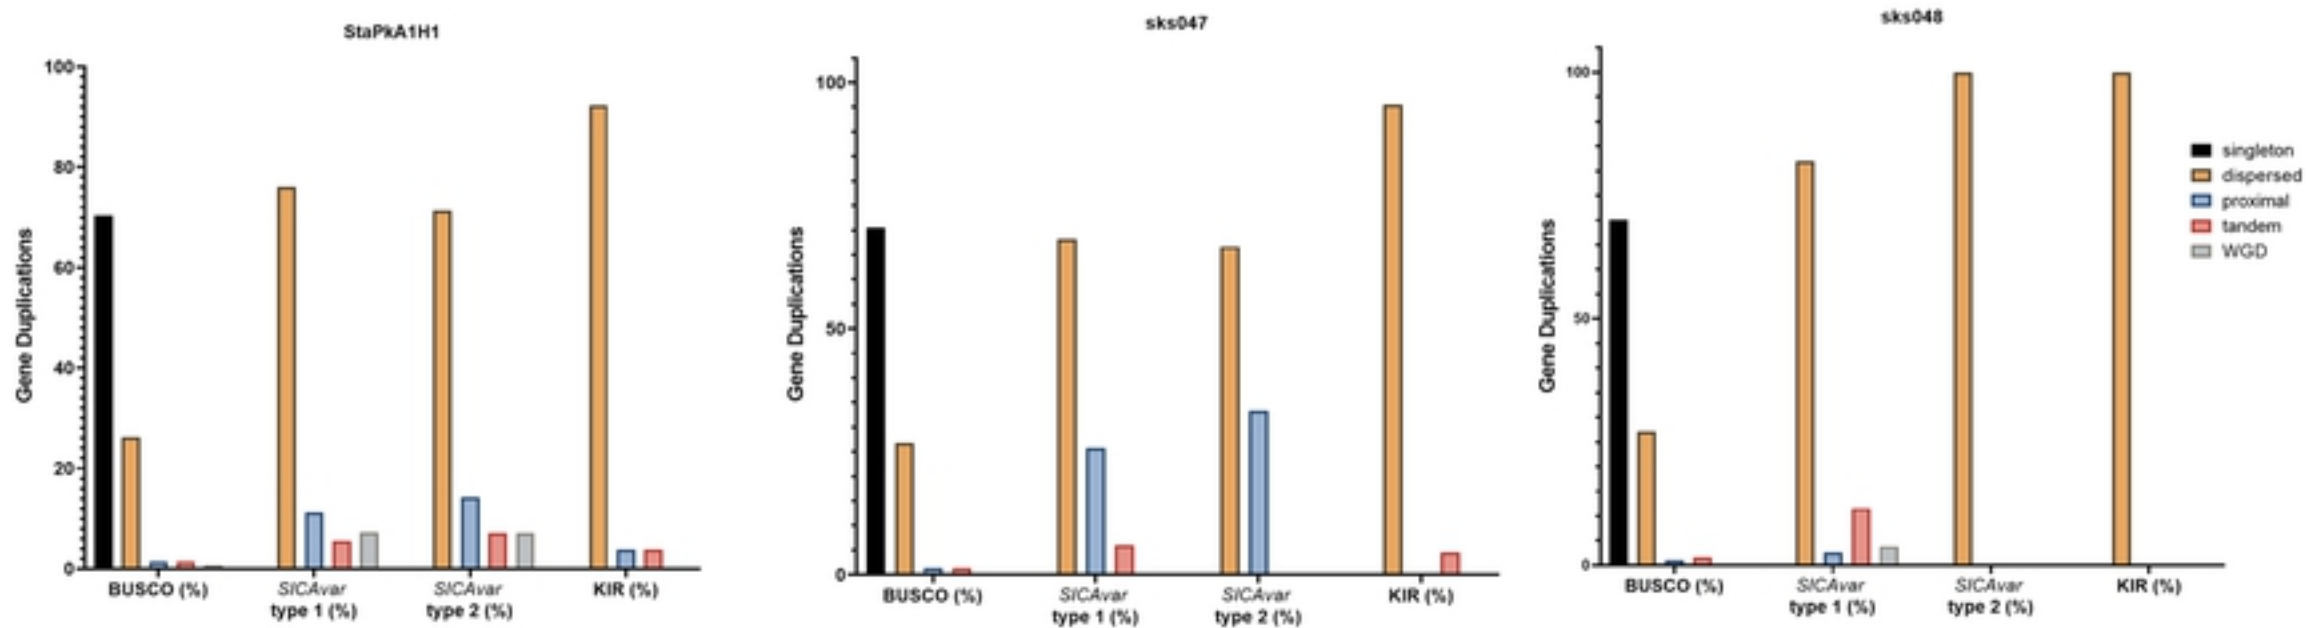

Figure 4

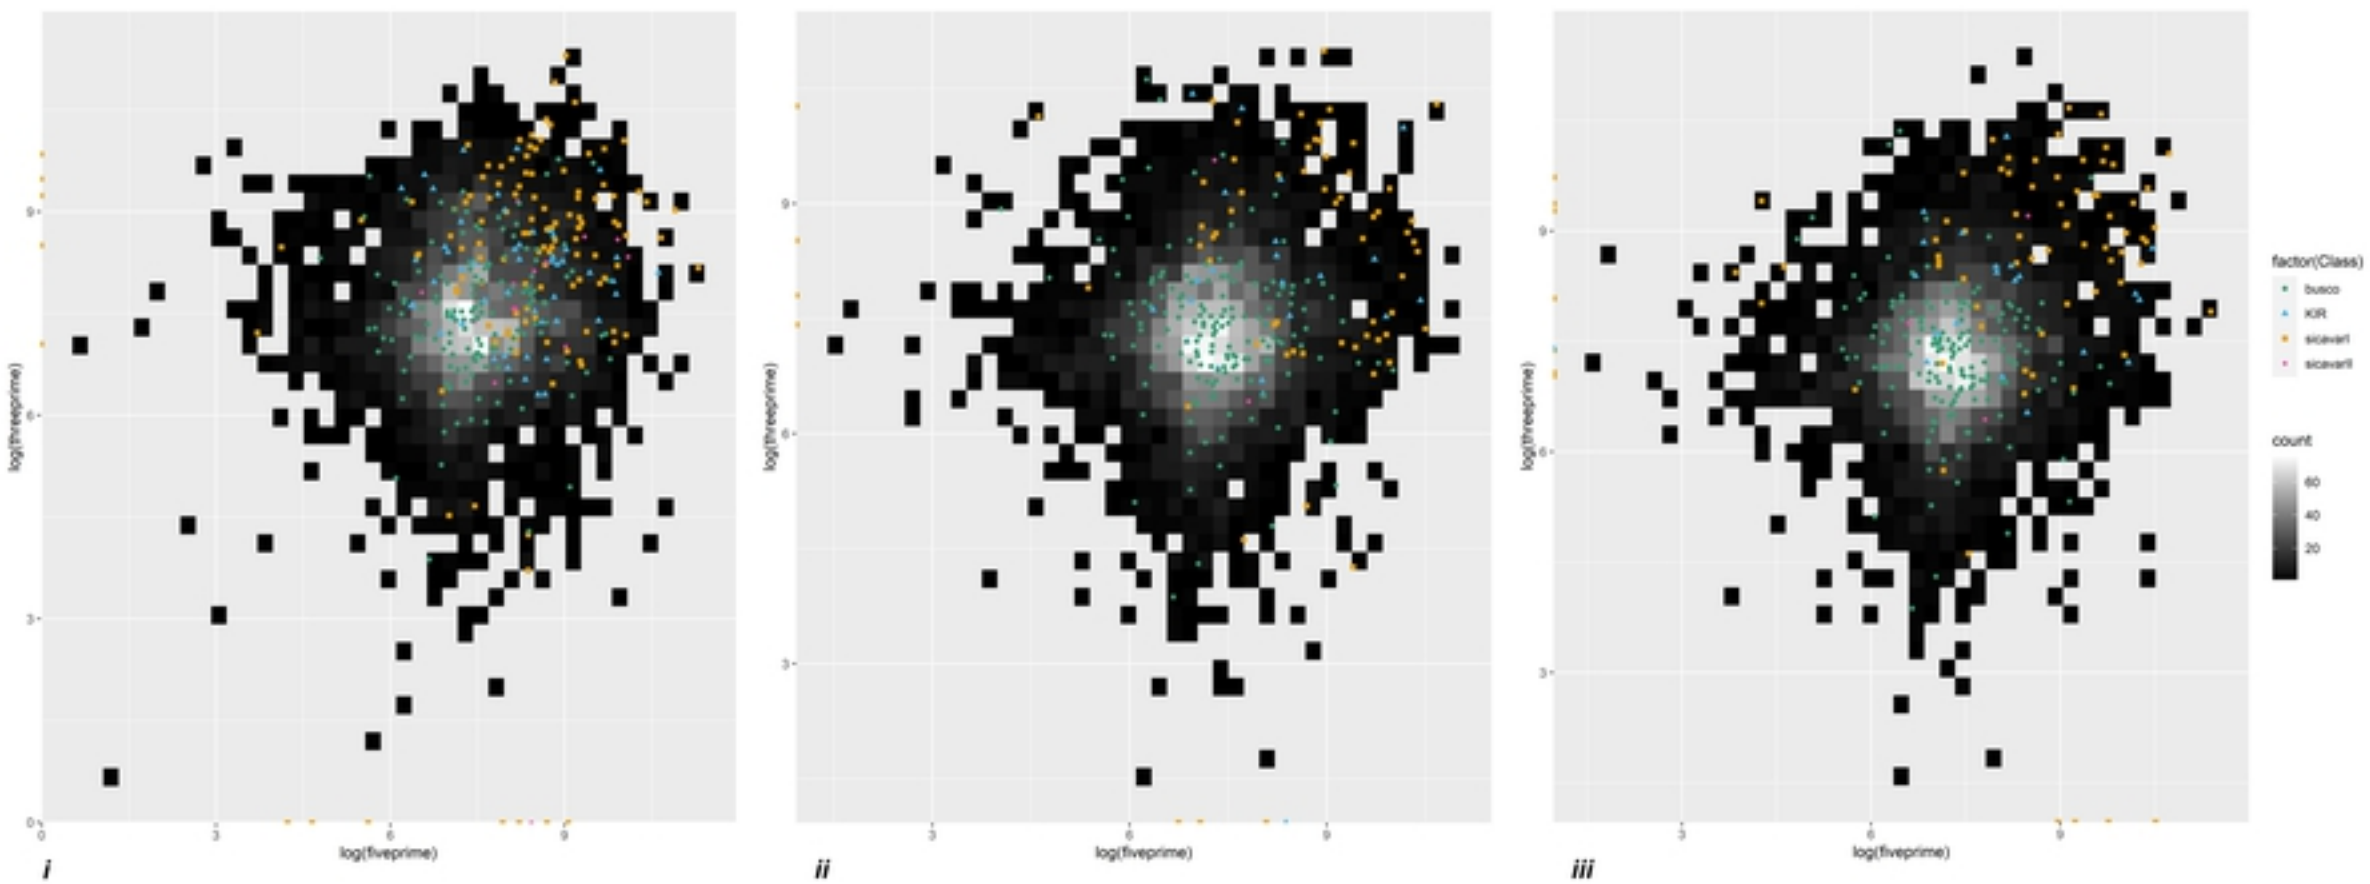

A  
Figure 5a

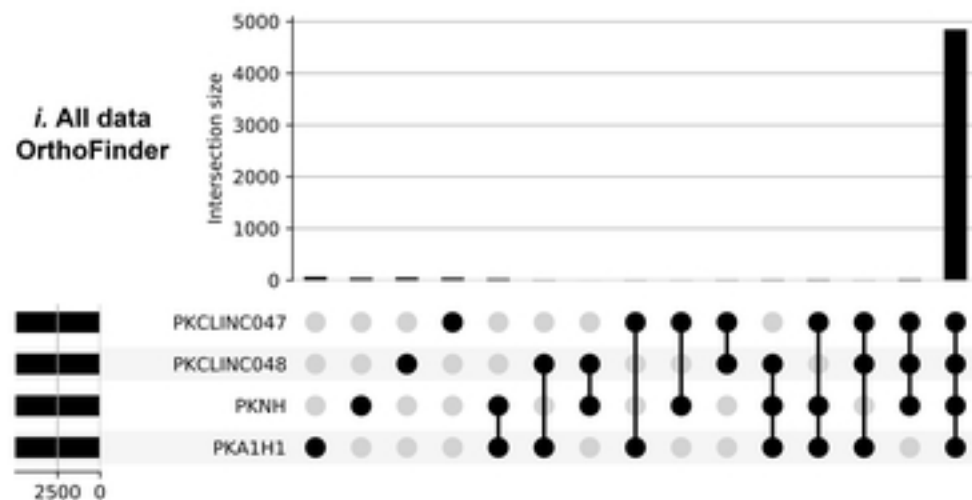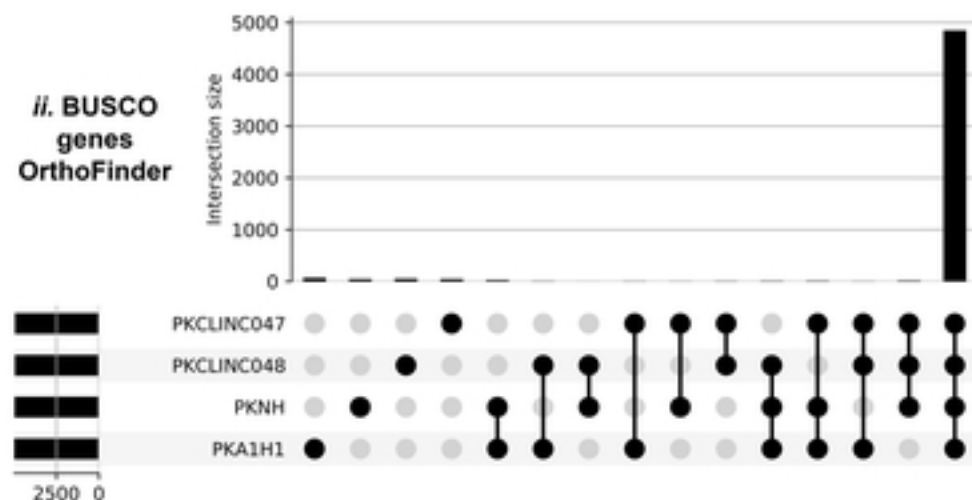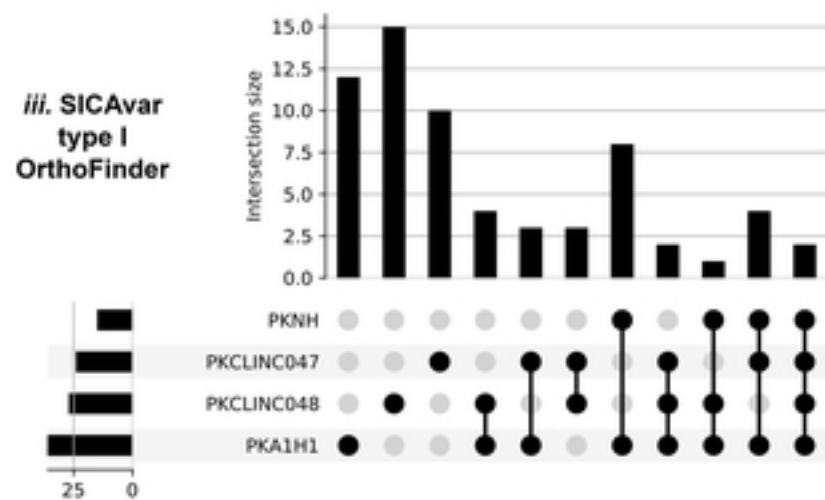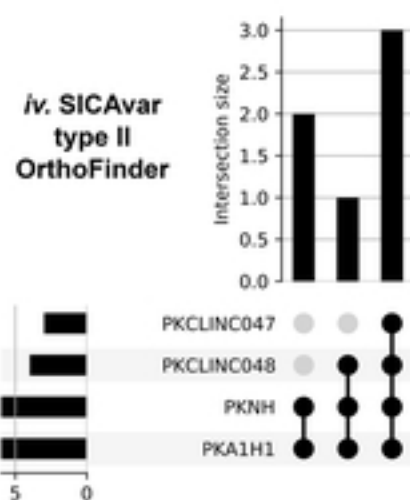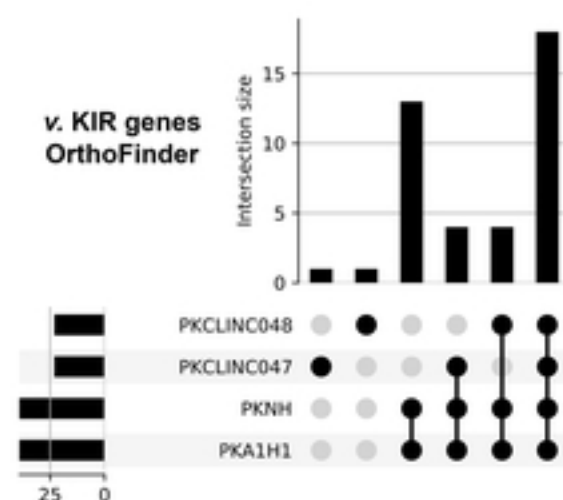

Figure 5b
